1           **Comparing adult hippocampal neurogenesis across species:**  
2           **translating time to predict the tempo in humans**

3  
4  
5  
6                           Christine J. Charvet<sup>1</sup> and Barbara L Finlay<sup>2</sup>

7  
8  
9                                           Running title:  
10                                           Comparing timetables of adult neurogenesis

11  
12  
13  
14   1. Christine J. Charvet, Department of Psychology, Delaware State University, Dover,  
15   DE, USA; Laboratory of Behavioral and Evolutionary Neuroscience, Department of  
16   Psychology, Cornell University, Ithaca, NY, USA.

17  
18   2. Barbara L. Finlay, Laboratory of Behavioral and Evolutionary Neuroscience,  
19   Department of Psychology, Cornell University, Ithaca, NY, USA

20  
21  
22  
23   Correspondence:  
24   Barbara L. Finlay  
25   [blf@cornell.edu](mailto:blf@cornell.edu)

26  
27  
28   Keywords: hippocampus, neurogenesis, adult, human, rodent, monkey, Ki67, allometry

29  
30  
31

## Comparing timetables of adult neurogenesis

32

33

### Abstract

34

35 Comparison of neurodevelopmental sequences between species whose initial period of  
36 brain organization may vary from one hundred days to one thousand days, and whose  
37 progress is intrinsically nonlinear presents large challenges in normalization. Comparing  
38 adult timelines when lifespans stretch from one year to seventy-five, when underlying  
39 cellular mechanisms under scrutiny do not scale similarly, presents challenges to simple  
40 detection and comparison. The question of adult hippocampal neurogenesis has  
41 generated numerous controversies regarding its simple presence or absence in humans  
42 versus rodents, whether it is best described as the tail of a distribution centered on early  
43 neural development, or is several distinct processes. In addition, adult neurogenesis may  
44 have substantially changed in evolutionary time in different taxonomic groups. Here we  
45 extend and adapt a model of the cross-species transformation of early  
46 neurodevelopmental events which presently reaches up to the equivalent of the third  
47 human postnatal year for 18 mammalian species ([www.translatingtime.net](http://www.translatingtime.net)) to address  
48 questions relevant to hippocampal neurogenesis, which permit extending the database to  
49 adolescence or perhaps to the whole lifespan. We acquired quantitative data delimiting  
50 the envelope of hippocampal neurogenesis from cell cycle markers (i.e., Ki67, DCX) and  
51 RNA sequencing data for two primates (macaque, humans) and two rodents (rat, mouse).  
52 To improve species coverage in primates, we gathered the same data from marmosets  
53 (*Callithrix jacchus*), but additionally gathered data on a number of developmental  
54 milestones to find equivalent developmental time points between marmosets and other  
55 species. When all species are so modeled, and represented in a common time frame, the  
56 envelopes of hippocampal neurogenesis are essentially superimposable. Early  
57 developmental events involving the olfactory and limbic system start and conclude  
58 possibly slightly early in primates than rodents, and we find a comparable early  
59 conclusion of primate hippocampal neurogenesis (as assessed by the relative number of  
60 Ki67 cells) suggesting a plateau to low levels at approximately 2 years of age in humans.  
61 Marmosets show equivalent patterns within neurodevelopment, but unlike macaque and  
62 humans may have wholesale delay in the initiation of neurodevelopment processes  
63 previously observed in some precocial mammals such as the guinea pig and multiple  
64 large ungulates.

65

66

67

## Comparing timetables of adult neurogenesis

### 68 **1.0 Introduction**

69

70 The following paper, a contribution to the collection “Adult Neurogenesis: beyond rats  
71 and mice”, is a hybrid of two components. At its core is an empirical contribution to the  
72 literature on hippocampal neurogenesis, comparing late neurogenesis in two rodents and  
73 three primates, using evidence from cell cycle markers. We have informed that analysis  
74 with the “Translating Time” project ([www.translatingtime.net](http://www.translatingtime.net)), where we have gathered  
75 evidence about the relative progress of neurodevelopmental events from the first  
76 birthdays of mature neurons until increasingly later ages across 18 mammalian species.  
77 We will argue that any claim that onset, offset or duration of a developmental process, or  
78 an adult brain feature produced by such a process, is “unique”, or even “specialized” in  
79 humans or any other species or taxonomic group is absolutely dependent on a proper  
80 allometric comparison, such as made possible by the “Translating time” modeling work,  
81 or other similar analyses. A comparison of a developmental feature of the brain of a  
82 particular rodent to particular primate species is not such an analysis, and will  
83 systematically mislead researchers.

84

85 The second component is a discussion of the problems and opportunities of  
86 developmental allometric analyses across mammals, which we present in this  
87 introduction. We include a review and exposition of basic allometric claims and  
88 procedures as they apply to brain mass and developmental duration in general, as well as  
89 the progress of neurogenesis targeted in this paper. We will describe some of the  
90 quantitative misunderstandings that typically arise from moving between the exponential  
91 functions used in allometric analyses, and the linear functions used in basic  
92 measurements of cell number and volume in developmental cell biology. The  
93 immediately following expanded introduction concerns the motivation, history, and  
94 methodology necessary to understand methods of analysis in developmental allometry.

95

### 96 **1.1 The purpose and methodology of allometric comparison**

97

#### 98 **1.1.1 Prior work on developmental allometry**

99

100 In order to limit the need to contrast statistical methodologies of successive papers within  
101 the text, the following description of species, neural structures, developmental span and  
102 mathematical models employed in this research project follows, including immediately  
103 relevant work of several other laboratories. First, the current database for the  
104 “Translating Time” model with tables of species, structures and sources, a description of  
105 the current model, and a utility to translate or predict a developmental equivalent day  
106 between any two species in the model can be found at [www.translatingtime.org](http://www.translatingtime.org) (Clancy  
107 et al., 2007). The initial comparison of neurogenetic schedules in rhesus monkey, cat,  
108 four rodents and a marsupial, extending from onset of neurogenesis to approximately  
109 birth in the monkey, using principal components analysis, is described in Finlay and  
110 Darlington (1995) and an extended discussion of statistical considerations, principally  
111 phylogenetic covariation can be found in Finlay et al. (2001). Darlington et al. (1999)  
112 and Clancy et al. (2000) bring the number of species to 9 eutherian (placental) mammals  
113 including humans and 6 metatherians (marsupials), principally using regression analyses.

## Comparing timetables of adult neurogenesis

114 Clancy et al. (2001) extend the neurodevelopmental events past neurogenesis to include  
115 synaptogenesis, cell death, ocular dominance columns and the like, using regression and  
116 the general linear model (see also Clancy et al., 2008). The relationship of individual  
117 variability to between-species variability is discussed in Finlay et al. (2011), and  
118 specifically in humans in Charvet et al. (2013). The current iterative model deriving the  
119 “event scale” of maturation developed in Workman et al. (2013) brings the number of  
120 mammalian species to 18, the number of developmental events to 271, including  
121 myelination, volume change, and early behavioral events, extending to human-equivalent  
122 of the third postnatal year. Particularly relevant to the present paper, patterns in the  
123 neural maturation of altricial versus precocial species are contrasted. A demonstration of  
124 the problems arising from a failure to account for allometric concerns can be found in  
125 “Human exceptionalism” (Finlay and Workman, 2013). Early behavioral development  
126 and related neuroplasticity are integrated with translating time in Finlay and Uchiyama  
127 (2017), and finally, evolution of life histories, including events like weaning and  
128 menopause in Hawkes and Finlay (2018). Readers are directed to the early work of  
129 Passingham (1985), and Garwicz et al. (2009), who use similar methods to examine  
130 early independent ambulation, as well as that of Halley’s studies of the growth of initial  
131 primordia and brain across a wide range of mammals (Halley, 2016, 2017). More  
132 recently, the advent of single cell RNA sequencing provides an exciting opportunity to  
133 investigate developmental trajectories of neural subpopulations across species (Habib et  
134 al., 2017; Iacono et al., 2017; Fan et al., 2018; Zhong et al., 2018). We here broaden the  
135 maturational range of neurodevelopmental ages of studies in our database to capture late  
136 stages of hippocampal neurogenesis across species.

137

### 138 **1.1.2 Allometry of brain and brain parts.**

139

140 The general form of scaling of neural mass or neuron numbers in any brain region  
141 compared to the whole brain, has been studied for many years (Jerison, 1973; Gould,  
142 1975; Fleagle, 1985). Overall consensus exists about general features of brain and body  
143 scaling, though subject to the normal continuing debate about optimal ways to quantify  
144 statistical variation in large and complex datasets (Finlay et al., 2001; Freckleton et al.,  
145 2002). We will take the particular example of cross-species comparisons of the volume  
146 and number of neurons in the neocortex, and particularly the frontal cortex (the allometric  
147 study of the brain), to introduce the related and less familiar topic of scaling of  
148 developmental duration across species, which we term developmental allometry.

149

150 If scaling of neocortical volume (or “isocortex”) is the focus for consideration, the fact  
151 that the human brain has a disproportionately large cortex compared to primates and most  
152 other mammals is quite “obvious” – for example, the human cortex comprises over 80%  
153 of its total brain mass, compared to around 20% in shrews and rodents (Finlay and  
154 Darlington, 1995). The correct empirical observation of the apparently disproportionate  
155 size of the cortex along with its persistent misinterpretation is the prototypical example of  
156 a problem we will call “human exceptionalism” (Finlay and Workman, 2013). The  
157 disproportionate volume of the human neocortex suggested to multiple researchers alike -  
158 - anthropologists, embryologists, neuroscientists and psychologists -- that it must be the  
159 result of special selection compared to the rest of the brain. Since the cortex was thus

## Comparing timetables of adult neurogenesis

160 thought to be the subject of selection within the brain, every cognitive alteration or  
161 adaptation in evidence in humans has typically been typically credited to its superior  
162 computational prowess. But it's not necessarily so. Although we have an unusually large  
163 brain, our cortex is the size it should be for a brain of our absolute size when cross-  
164 species cortex volume or cell numbers are represented on logarithmic scales (Jerison,  
165 1973; Hofman, 1989; Finlay and Darlington, 1995; Kaas and Herculano-Houzel, 2017).

166

### 167 **1.1.3 Linear scales, logarithmic scales and the allometric equation**

168

169 A “proper” comparison of variations across species of different sizes and developmental  
170 durations requires care (this section is abridged from Hawkes and Finlay, 2018 to which  
171 the reader is directed for a more extensive discussion). Even with “all else equal” in such  
172 factors as a species’ niche, number of brain components, sex and age, still, the laws of  
173 geometry, and of physics and chemistry, impose lawful changes in both form and process  
174 with increase in brain mass. The intrinsic geometry of physical relationships results in  
175 variable allometric relationships (e.g., doubling the volume of a sphere only increases its  
176 radius by 1.26 times). After such geometric constants are understood, any two structures  
177 or processes changing in size or duration across species could show nonlinear scaling  
178 relationships, scale linearly, or might show no predictable scaling, depending on the  
179 mechanisms or functions that are relevant. For example, the divisions, doubling and  
180 redoubling of stem cell pools are best described by nonlinear equations. Some features  
181 change linearly: for example, if multiplied by the appropriate constant, cross-sectional  
182 diagrams of mice and rat eyes are superimposable even though the rat’s eye is twice as  
183 big, as both are solving a linear optical problem with the same materials (Remtulla and  
184 Hallet, 1985). Some features do not scale at all with brain mass (considering mammals  
185 only here), such as the diameter of the cell bodies of neurons, the time to complete the  
186 first generation of a mature neuron, or the duration of action potentials. Such variable  
187 geometrical and biological scaling relations can coexist for different aspects of the same  
188 structure. Finally, datasets of interest often have underlying geometries that can mislead  
189 graphical comparisons. Consider a typical Mercator projection of the earth’s landmasses,  
190 where the continents of Africa and Greenland appear approximately equal in size, but  
191 when measured in its correct spherical coordinates, Africa is more than 10 times larger  
192 than Greenland.

193

194 Allometries are conventionally represented as scaling relationships. If the relationship  
195 between two features that correlate with each other in size, say ‘x’ and ‘y,’ is represented  
196 as  $y=kx^a$  where ‘k’ is some constant, and the exponent ‘a’ represents the rate at which ‘y’  
197 changes with respect to a change in ‘x.’ If exponent ‘a’ is more or less than 1 then a  
198 change in y is associated with a geometrical change in ‘x.’ Such geometrical or  
199 exponential relationships can be plotted and visualized as linear ones by logarithmic  
200 transformation:  $\log y = a \log x + \log k$ . In such log plots, the exponent ‘a’ now appears as  
201 the slope of the increase in y with respect to x. Using this representation of cortex mass  
202 relative to the whole brain is represented on a logarithmic scale, it is clear that the human  
203 neocortex is exactly the size it “should” be (Figure 1). The human brain is absolutely  
204 large compared to other primates, but given this large brain size, each part falls onto its  
205 “expected” position, from hindbrain to cortex (Hofman, 1989). The cortex has “positive

## Comparing timetables of adult neurogenesis

206 allometry” with respect to the rest of the brain, its slope greater than one, which is the  
207 “linear scaling reference” of Figure 1. Inevitably, therefore, with different brain  
208 components each increasing in mass at different rates, larger mammalian brains become  
209 “disproportionately” composed of cortex. The exact exponent of cortical positive  
210 allometry might vary with whether neurons, all cells, surface area or volume is measured,  
211 and shows some taxon-specific differences, but none reduce the positive exponent to one  
212 or less (a sampling of a large literature: Jerison, 1973; 1989; Hofman, 1989; Reep et al.,  
213 2007; Herculano-Houzel et al., 2017; Charvet et al., 2013).

214

215 Because of the regular, predictable relationships of the relative sizes of brain parts at all  
216 absolute brain volumes, lacking other information, our large cortex cannot be attributed  
217 to special selection for that feature, as it comes “for free” with selection on the whole  
218 brain, or in fact, could arise by leverage by selection on any part of the brain (Finlay and  
219 Darlington, 1995). It is interesting, to be sure, that over evolutionary time that the cortex,  
220 and the cerebellum are the two brain regions where disproportionate neuron number,  
221 volume and energy consumption are routinely allocated (Finlay et al., 2011).  
222 Comparison of relative cortical and cerebellar volume between any two mammals of  
223 different brain size will reveal this feature, not only comparison of the human brain with  
224 all others. The most telling evidence is that those several mammalian brains which are  
225 absolutely larger in mass than the human brain, including several cetaceans and  
226 ungulates, continue the allometric equation of the cortex, so that they have  
227 proportionately even more cortex than humans do (Figure 1).

228

### 229 **1.1.4 The evolutionary question at issue: the case of the prefrontal cortex**

230

231 Questions involving allometric scaling are in no way historical debates as a similar  
232 controversy is ongoing about whether a specific region of cortex, the prefrontal cortex, is  
233 “allometrically unexpected” in humans (Sherwood and Smaers, 2013). Just as the cortex  
234 has a particular exponent of enlargement with respect to the rest of the brain, every  
235 cortical area (e.g., prefrontal, primary visual) has its own exponent (or slope in the log-  
236 transformed equation) showing its change in relative volume compared to overall cortex  
237 volume. Both the prefrontal and parietal cortex regions have an exponent that is larger  
238 than the cortex’s overall exponent, showing a positive allometry (Jerison, 1997). The  
239 issue under debate is whether the frontal cortex in humans is larger still than would be  
240 expected from its already high positive allometry (Barton and Venditti, 2013; Chaplin,  
241 Yu, Soares, Gattass, and Rosa, 2013; Passingham and Smaers, 2014; Semendeferi, Lu,  
242 Schenker, and Damasio, 2002). As before, however, when we discussed preferential  
243 allocation of “excess” neural mass for cortex and cerebellum versus the rest of the brain,  
244 it is interesting that it is frontal and parietal cortex that are preferentially enlarged in the  
245 cortical sheet when brains increase in volume across mammals.

246

247 Why should these researchers care about this issue? If researchers claim a region’s  
248 volume is “allometrically unexpected” in humans, they are claiming that it must have  
249 been the target of selection, typically because of special importance of the function  
250 ascribed to that brain region in that species. In the case of the frontal cortex, the  
251 cognitive features usually evoked are cognitive control, the ability to choose reasonable



## Comparing timetables of adult neurogenesis

252 behavioral solutions from competing possibilities, or to evaluate choices with respect to  
253 goals distant in space or time. Thus, the claim that the frontal cortex is allometrically  
254 unexpected in humans is a claim that humans have been selected on a behavioral feature  
255 like cognitive control, which in turn is improved with the relative volume of frontal  
256 cortex. Structures that change their volume according to regular, cross-species  
257 allometric rules, however, even if they look disproportionate on a linear scale, require no  
258 special explanation. If the entire brain has been under special selection for larger size in  
259 any species, every single change in the proportionality of its parts is generated by its  
260 change in size. We'll make no ruling on this claim, except to note that the deviation in  
261 human frontal cortex volume, if it exists, is small enough to make it susceptible to  
262 relatively minor differences in methodology between research groups.

263  
264 It remains interesting and important that brains enlarge in particular ways, and that  
265 predictable patterns of reorganization, both behavioral and computational, are associated  
266 with cortical enlargement (Finlay and Uchiyama, 2015). Mammals with large brains are  
267 certain to show evidence of a disproportionate contribution of frontal cortex (Passingham  
268 and Smaers, 2014). Allometric regularities in structural scaling, whether in the cortex, or  
269 in the hippocampus we will soon be discussing, require that we investigate coordinated  
270 mechanisms *outside* the structures of interest, and should make us skeptical of causal  
271 accounts that depend on selection on hypothesized special adaptations of the particular  
272 species of animal.

273  
274 An important mechanism of volumes and neuron number coordination in several cases  
275 studied so far appears to be the coordinated control of duration of neurogenesis, as  
276 applied to every part of mammalian brains (e.g. Cahalane et al., 2014; Charvet and  
277 Finlay, 2014; Dyer et al., 2009; Finlay and Darlington, 1995). As the duration of  
278 hippocampal neurogenesis is the subject of the empirical component of this paper, we  
279 will now turn to issues in the allometry of development.

280

### 281 **1.2 The allometry of developmental duration: basic requirements**

282

#### 283 **1.2.1 The need for data from multiple species: why attempts to “norm”** 284 **measurements between only two species will be ineffective**

285

286 The formal properties of “allometrically expected” changes in mass also apply to  
287 translations of developmental time from one species to another. The appropriate  
288 coordinate system to represent time translations will depend on the data to be represented,  
289 and the representation desired. The relationship of developmental timing between  
290 species cannot be presumed to be best represented on a linear scale. In order to fairly  
291 compare developmental durations between animals, enough data must be collected from a  
292 number of relevant species to support generating an allometric equation with credible  
293 confidence intervals for its slope and intercept. For example, taking a first example from  
294 volume allometry, if you hypothesized that special selection in humans for language  
295 ability resulted in a comparatively larger Broca's area, it is necessary to show that the  
296 size of Broca's area in humans exceeds its expected allometric position compared to  
297 Broca's area in other primates (Schoenemann, 2006). A “control structure” such as

## Comparing timetables of adult neurogenesis

298 primary visual cortex, a subcortical structure, or the rest of the brain cannot be used to  
299 “normalize” the volume of Broca’s area, as allometric relationships in brain volumes can  
300 be expected to be nonlinear. Broca’s area will be disproportionately large in humans  
301 versus rhesus monkeys, but it will also be disproportionately large in rhesus monkeys  
302 versus marmosets, or in horses versus sheep, where relative language competence will  
303 not apply. If Broca’s area has positive allometry compared to visual cortex, every  
304 contrast of a large and small mammalian brain will *always* show disproportionate volume  
305 increase in Broca’s area in the larger brain. Similarly, the question of whether  
306 hippocampal neurogenesis and maturation is unusually early or late in humans depends  
307 on whether the timing of hippocampal maturation deviates from its expected  
308 developmental allometry.

309  
310 Inappropriate norming procedures applied to developmental timing questions will  
311 produce the identical errors to those produced by inappropriately norming allometric  
312 comparisons of volume. You cannot, for example, compare the time from birth to  
313 adolescence in chimpanzees versus humans, see that the duration is longer in humans,  
314 and conclude that human have been specially selected for a longer childhood. The  
315 duration may be entirely predictable from the time required to generate a large brain,  
316 intrinsic correlation with longevity or some other superordinate feature of life history.  
317 The “translating time” database was collected, in part, to be able to understand such  
318 comparisons in a larger cross-species context. A major surprise of this work was the  
319 extreme regularity of neural development in mammals, which in addition to the interest  
320 of the regularity alone, gives us a reliable set of brain-based benchmarks to understand  
321 the relative maturation of each species with respect to life-history events like birth or  
322 weaning (Hawkes and Finlay, 2018).

323

### 324 **1.2.2 Setting zero, or onset of neurodevelopment: birth is not a reliable indicator of** 325 **brain maturation**

326

327 All allometric equations have a slope and an intercept, but in developmental allometry,  
328 the intercept often suggests a real-world developmental meaning, for example, the onset  
329 of neurogenesis, or conception, or birth. Even though a real-world event like conception  
330 may appear to be a likely candidate for “zero” in an allometric equation, this must be  
331 mathematically determined, not stipulated. In “translating time”, the best fit for “day  
332 zero” to the empirically measured neuroembryological data first proved to be a point  
333 located between conception and first production of mature neurons, possibly implantation  
334 (Finlay and Darlington, 1995; Finlay et al., 2001; Workman et al., 2013). Although birth  
335 is often chosen as a natural zero in anthropological work, and especially for research on  
336 late hippocampal neurogenesis to be discussed here, for the good theoretical reason that it  
337 marks the beginning of the independent life of the organism, and for the practical reason  
338 that prenatal measurements often hard to come by, still, this choice can be very  
339 misleading when attempting to compare developmental schedules (Figure 2). We will  
340 explain the derivation of the axes and the maturational progress represented on this graph  
341 in more detail in the next section, but for the moment, the x scale, the “event scale” is a  
342 multivariate measure of overall maturational state of the nervous system, with the  
343 generation of the first neurons near “0”, with “1” corresponding to about 3 years



## Comparing timetables of adult neurogenesis

344 postnatal in humans, with embryological features like achievement of 80% of adult brain  
345 volume and variable progress of myelination. The Y axis is post-conception days of  
346 development on a linear scale – on a log scale, the allometric equation of each curve  
347 plotted would become a straight line (Figure 3). Post-conception days are plotted on a  
348 linear scale in this graph to emphasize the extreme divergences in absolute days to  
349 maturity in the species plotted here.

350

351 We have stressed the importance of two basic features of developmental allometric  
352 analysis critical for interpreting the presence or absence of “postnatal” or “adult  
353 neurogenesis”. The first is obtaining developmental data from enough species to  
354 generate reliable allometric equations, and the second is locating a true “zero” from  
355 which to scale maturational events in the same equations. The Translating Time database  
356 and model can supply both necessities. Exploring “postnatal” neurogenesis in the  
357 hippocampus will be reporting on very different phenomena if mice, precocial guinea  
358 pigs, or humans are compared.

359

### 360 **1.2.3 A brief review of our specific methodology for comparing neurodevelopmental** 361 **sequences across species**

362

363 Over the past 20 years, a database and methodology to compare the progress of neural  
364 development across species have been elaborated ([www.translatingtime.net](http://www.translatingtime.net)). The  
365 multiple statistical considerations leading to this representation can be found in the series  
366 of papers detailed in the first section, and a full description of the model in Workman et  
367 al. (2013). The original purpose of this work was to describe a mammalian “Bauplan”  
368 for neural development, and thus identify deviations from this plan that might mark  
369 taxon- or species-specific alterations corresponding to evolutionary adaptations, which is  
370 exactly how we will employ it for to examine the hippocampal data we have collected.  
371 The present model includes 18 species, and 271 “events” of mixed type, including  
372 neurogenesis in particular structures or cell classes (e.g., Layer 4 of striate cortex;  
373 Purkinje cells in the cerebellum; onset of synaptogenesis in a thalamic nucleus;  
374 emergence of some minimal behavioral reactivity, and transitions capturing continuous  
375 processes such as increases in brain volume or myelination).

376

377 The model from Workman et al., 2013 is reproduced in Figure 2, and extends to a  
378 maturational stage equal to approximately 3 years postnatal in humans. Only events in  
379 brain and some early behavioral capacities are included to model the event scale and each  
380 species’ regression line – no measures of body or organ maturation or volume, or  
381 interactional, life history events like birth or weaning are included in this version. The  
382 “event scale”, which is the best order and interval relationship of the 271 distinct  
383 neurodevelopmental events in the 18 species, is fit iteratively to all the data, (x-axis,  
384 Figure 2). The speed of progress of each individual species through these events is given  
385 as a regression equation, in days on a log scale (y-axis; compare the linear scale in Figure  
386 2 of the same functions). It is more typical to plot time on the x-axis in developmental  
387 studies, and it is important to remember this difference in representation. Days are on the  
388 Y-axis because we are interested in duration as a function of maturational state. For  
389 example, for species with different sized brains, how long will it take them to reach

## Comparing timetables of adult neurogenesis

390 equivalent maturational states? The differences in each species' slope show differences  
391 in maturational rate, with steeper slopes meaning slower progress through maturational  
392 stages in absolute time: the mouse takes only about 30 days to execute its 271  
393 neurodevelopmental events, while the human takes 1000 days, as humans generate  
394 greater numbers of neurons and volumes of connectivity per event.  
395

396 The fit of model results to empirically-measured results is astonishingly close, 0.9929,  
397 which reflects an extreme, and initially unexpected conservation of developmental  
398 sequences in mammals. Only two interaction terms are necessary to produce taxon-  
399 specific differences in these data so far, which are the black-circled points floating above  
400 the larger number of points of the corresponding color. The first term corresponds to a  
401 delay in corticogenesis in primates, some marsupial species and carnivores (n.b: this can  
402 be equally well represented as an advance in initiation and termination of neurogenesis in  
403 the "rest of the brain" --Clancy et al., 2001; Workman et al., 2013, Charvet et al.,  
404 2017ab). The second represents a delay in neurogenesis in the retina of the nocturnal cat  
405 and ferret (also owl monkey, Dyer et al., 2009). Extensions in cortical neurogenesis  
406 produce a disproportionate expansion of the cortex and, in particular, upper layer neurons  
407 in primates (Cahalane et al., 2014; Charvet et al., 2015, 2017ab), and a greater number of  
408 rods and rod-associated neurons in carnivores and owl monkeys.  
409

### 410 **1.2.3.1 Birth can intersect quite different developmental events in different species**

411  
412 As noted earlier, birth may occur at a wide range of stages in neural development in  
413 different species. For example, cortical and cerebellar neurogenesis is ongoing at birth  
414 in some rodents, but in primates, both are largely concluded at that time. No obvious  
415 inflections, halts or accelerations near birth can be found in basic central nervous system  
416 construction. There is one event, a whole-brain surge of synaptogenesis, which appears  
417 to just antedate either birth or burrow exit in the four mammals studied to date instead of  
418 conforming the otherwise monolithic neurodevelopment program (reviewed in Finlay and  
419 Uchiyama, 2017).  
420

### 421 **1.2.3.2 Other evidence for regular mammalian neurodevelopment**

422  
423 Empirical support for the surprising claim of an extremely conserved mammalian  
424 neurodevelopmental schedule can be found in several independent sources. Mammalian  
425 brains continue to grow after birth, and Passingham (1985) first noted that if the volume  
426 of the brain at birth is plotted against gestation length for an eclectic set of eutherian  
427 mammals, including rats, pigs and dolphins (log transformed), a straight line results,  
428 suggesting brain mass is produced generally at the same rates in all species, smaller  
429 brains simply ceasing their growth earlier (Passingham, 1985). Halley, in a much larger  
430 and more closely measured data set of changes in brain volume post conception, recently  
431 confirmed the same notion (Halley, 2016, 2017). We have also successfully modeled the  
432 development of neuron number in the cortex combining information on kinetics of  
433 neurogenesis with adult neuron numbers in multiple species (Charvet and Finlay, 2014;  
434 Cahalane et al., 2014). Other observations of single maturational phenomena give other

## Comparing timetables of adult neurogenesis

435 insights, and underline further unexpected consequences of this conserved  
436 neurodevelopmental rate.

437

### 438 **1.2.3.3. Two surprising findings about precocial animals**

439

440 In mammals, the onset of walking is predicted by neural maturation (which is conserved)  
441 but not birth or any known niche variable. The time of the first unsupported step is  
442 highly predictable from a developmental allometric equation derived from adult brain  
443 mass, including one interaction term slightly accelerating the time of first step for those  
444 species with a plantigrade standing position (Garwicz et al., 2009), which fits seamlessly  
445 into the translating time model. This monolithic nature of the neurodevelopmental  
446 program, and its close correlation with brain size puts an interesting constraint on  
447 precocial mammals. Relatively large-brained, precocial ungulates like sheep and elk,  
448 who must be ready to run just after birth, accomplished this evolutionarily by extending  
449 gestation and delaying birth in their large offspring to match conserved parameters of  
450 brain development. They do not selectively advance the general rate of brain maturation  
451 nor push forward the maturation of circuitry closely associated with ambulation apart  
452 from the rest of the brain, which might seem to be a less stressful solution.

453

454 A related peculiarity can be seen in precocial species with relatively small brains such as  
455 the guinea pig and spiny mouse, that are born looking and moving quite mature, furred,  
456 and with sensory systems functional. While it might seem a reasonable strategy to make  
457 the most of every possible second for brain maturation available *in utero* in precocial  
458 species, to allow fine tuning of the coordinated behavior required immediately after birth,  
459 the conserved pace of brain maturation seems to rule this out. Since these animals must  
460 also produce large, mature bodies, which appear to require more time than the brain, the  
461 onset of neural development as marked by the first postmitotic neurons is substantially  
462 *delayed*, not stretched to fill the available time, allowing somatic maturation a head start  
463 (Workman et al., 2013). We will discuss whether a similar situation is present in  
464 marmosets, born with some precocial features.

465

### 466 **1.3 Applying “Translating Time” to the question of late hippocampal neurogenesis**

467

468 The first reports of neurogenesis in adult humans and other mammals produced much  
469 excitement, in that it contradicted the central dogma that no new neurons are generated  
470 in adulthood and offered a possible avenue for brain rehabilitation and repair. At first,  
471 the presence of new neurons was reported widely throughout the forebrain, but in time,  
472 unambiguous neurogenesis was finally limited to two locations, the hippocampus and the  
473 olfactory bulb via the “rostral migratory stream”, mostly from work in rodents, but with  
474 confirmation in humans (Ming and Song, 2005). Recently, however, the existence of  
475 significant adult hippocampal neurogenesis has been questioned (Dennis et al., 2016;  
476 Kempermann et al., 2018; Andrae et al., 2018; Sorrells et al., 2018; Lee and Thuret,  
477 2018). A report by Sorrells et al. (2018) concluded that neurogenesis in the human  
478 hippocampal dentate gyrus drops to undetectable levels during childhood, suggesting that  
479 human hippocampal neurogenesis is unlike that of other mammals (Knoth et al., 2010). A  
480 concurrent study (Boldrini et al., 2018) also investigated adult neurogenesis in the human

## Comparing timetables of adult neurogenesis

481 hippocampus (14 to 79 years of age) and contradicts the first study. Using quite similar  
482 methodologies, the second group argued that adult hippocampal neurogenesis is in fact  
483 present throughout the lifespan. In such cases of contradiction, consultation with the  
484 animal model literature is of major help. A problem that has plagued this work is the  
485 absence of a robust and reliable way to compare time courses of events in different  
486 species. Adult hippocampal neurogenesis of any species could represent the tail end of a  
487 normal embryonic period of neurogenesis, or a truly indeterminate phenomenon, as is  
488 seen in virtually all non-mammalian vertebrates, or perhaps a targeted rekindling of  
489 neurogenesis for a particular purpose in adulthood. Because of the methodological  
490 similarity of the two studies, it may not be possible to rule in favor of one or the other on  
491 reported evidence, but a better idea of where errors might lie is a natural outcome of  
492 quantitative developmental modeling.

493

### 494 **1.3.1 Specific objectives 1: extending the translating time model and representing** 495 **species on a common scale.**

496

497 As we described previously, mammalian species vary in the length of both neural and  
498 somatic development, the positioning of birth with respect to neural maturation, and the  
499 relative length of neurogenesis in different structures. Comparing humans to macaques  
500 and mice, human neurodevelopment is much longer (duration correlating close with brain  
501 volume, as does the duration of lifespan). Humans are born at a slightly earlier stage of  
502 neural maturation than macaques, and at much later stage than rats and mice. Rhesus  
503 monkeys and humans also curtail neurogenesis in limbic structures relatively earlier than  
504 rodents (Workman et al., 2013), corresponding to the fact that as limbic structures are  
505 systematically relatively smaller (that is, scale with a smaller exponent) in primates  
506 compared to rodents (Reep et al., 2007). The translating time model at present does not  
507 have good data representation for late developmental stages to allow close comparisons  
508 in adulthood. We are therefore adding new data, and one new species to extend the  
509 model farther into the lifespan, but without any substantive change in its basic structure.  
510 We find appropriately- transformed envelopes of neurogenesis across species to be very  
511 similar, and continuous.

512

### 513 **1.3.2 Specific objectives 1: Closer examination of human hippocampal neurogenesis** 514 **and the problems of detecting non-scaling cellular events in a nonlinearly scaling** 515 **lifespan**

516

517 We consider the allometric nature of developmental schedules in humans to identify how  
518 hippocampal neurogenesis should vary if the duration of hippocampal neurogenesis in  
519 humans is similar to that of rodents. Further, the ability to align timetables allows us to  
520 investigate an intrinsic problem of detection of a cellular signal in scaling situations,  
521 which is that organismal variables of size and duration show robust scaling, but cellular  
522 phenomena like action potentials, the length of the cell cycle and so forth rarely do. A rat  
523 may expect to live around 700 days post-adolescence, while an approximate comparable  
524 human figure is 25,000 days. If the cellular processes associated with an occasion of  
525 neurogenesis are transitory, and almost certainly do not scale with lifespan, the  
526 probability of simple detection falls radically in the long lifespan. We will discuss this

## Comparing timetables of adult neurogenesis

527 aspect of scaling both as a methodological problem, and as a question about the  
528 importance of extremely low-probability events.

529

### 530 **2.0 Materials and Methods**

531

#### 532 **2.1 Species and sources**

533 In order to extend the current neurodevelopmental model to later developmental stages,  
534 we added some additional data on the timing of developmental milestones in two rodent  
535 species (i.e., rats, mice), and 3 primate species (i.e., macaques, marmosets, humans).  
536 “Developmental events” capture rapid transformations, such as onset of neurogenesis or  
537 any other process, or arbitrary divisions of continuous processes into epochs (e.g., 20%,  
538 40%, 60% and 80% of a structure’s adult volume). Examples of developmental events  
539 include birth-dating of cell types, synaptogenesis, myelination, changes in protein and  
540 RNA expression. The new types of data added were those capturing temporal changes in  
541 cell proliferation from markers (i.e., DCX, Ki67) in the hippocampus. We only include  
542 developmental events present in at least two species, and at least one rodent species.

543

544 We identified variation in proliferative and newly born neuron numbers over the course  
545 of prenatal and postnatal development in primates and in rodents. More specifically, we  
546 collected previously published data where the number of Ki 67+ (proliferative) and newly  
547 born (DCX+) cells relative to the total number of hippocampal granule cells was  
548 quantified at several stages of development in rodents and in primates. We defined as  
549 epochs when Ki67+ cells decline to 2%, 0.7%, 0.5%, 0.3%, 0.2%, and 0.1% of total  
550 granule cells in primates and rodents. We also identified when the number of DCX+ cells  
551 reach 3, 2.5, 2, 1.5, 1, and 0.5% of total granule cells in rodents and in primates. To do  
552 so, we fit a linear regression between the natural-logged values of age and the relative  
553 number of cell markers to compare the duration of the decline in late hippocampal  
554 neurogenesis between primates and rodents (Figure 3). We only selected age ranges in  
555 which there is a sharp decline in the relative number of Ki67 and DCX+ cells over time  
556 as assessed on a natural-log scale. This permits fitting a linear regression through the data  
557 for each species (Figure 3). These data are from Merrill et al., 2003; Rao et al., 2006;  
558 Jabès et al., 2010, Ben Abdallah et al., 2010; Amrein et al., 2015, Amrein et al., 2011,  
559 and Hochgerner et al., 2018. For rats, we considered the number of Ki67+ and DCX+  
560 cells from Rao et al., 2006 and total granule cell numbers from Merrill et al., 2003. We  
561 consider studies that normalize the total number of proliferative and immature cells  
562 relative to total granule cells rather than those that consider the number of proliferative  
563 and immature neurons per mm<sup>2</sup> of tissue.

564

565 We consider developmental transitions as the emergence of “plateaus” in the expression  
566 of multiple genes in single structures. We identified such plateaus in RNA expression  
567 from RNA sequencing data of bulk from the hippocampus in both species (Iacono et al.,  
568 2017). We identified when expressed genes reach a plateau in their expression across  
569 14,417 orthologous genes as defined by the mouse genome database (Smith et al., 2018).  
570 We used a non-linear model with the software package R (easynls, model 3). Only  
571 orthologous expressed genes were considered. Age ranges were constrained to vary  
572 between 101 to 999 days in humans (n=10) and between P1 to P30 in mice (n=15) to



## Comparing timetables of adult neurogenesis

573 compare roughly equivalent developmental time windows across these two species. We  
574 used normalized RNA sequencing expression made available by the Allen brain Institute.  
575 RNA expression from mice hippocampi was obtained from Iacono et al. (2017; GEO:  
576 GSE79380). We selected only those models with p values of coefficients less than 0.05 in  
577 humans and mice. This resulted in 34 genes in which plateaus were identified in both  
578 species. We averaged the age in which plateaus in RNA expression we identified in both  
579 species and include these data as one developmental event.

580

### 581 **2.2 Developmental timing in marmosets**

582

583 We gathered available data on the timing of early neurodevelopmental events for the  
584 marmoset as we had done for other species. We matched our previously collected  
585 database on developmental event definitions, principally using anatomical changes from  
586 structural MRI scans (Hikishima et al., 2013), spatiotemporal changes in gene expression,  
587 as well as anatomical transformations from the literature. Examples of developmental  
588 events include morphological events such as first observation of retinal axons in the optic  
589 stalk, or when neurofilament heavy polypeptide (NEFH) expression emerges in the  
590 cortex. Because the marmoset is increasingly used as a model organism, we expect this  
591 inclusion to be useful past this study alone. To compute the timing of developmental  
592 events from MRIs, we noted the earliest age in which a event had occurred and the latest  
593 age in which the event had not yet occurred, as we had done previously (Charvet et al.,  
594 2010; Workman et al., 2013). In total, we include 29 events for marmosets.

595

### 596 **2.3 Statistical analyses**

597

598 We include 213 developmental events from Workman et al., 2013 and Charvet et al.,  
599 2017b, eliminating events capturing the timing of cortical neurogenesis because cortical  
600 neurogenesis is extended in primates compared with rodents. We only included  
601 developmental events present in at least two of the species. Of the 213 events, 47  
602 represented events or stages in limbic system development, including neurogenesis  
603 timing as well as the emergence of axonal pathways of limbic structures. We added 22  
604 developmental events, 14 of which that capture the decline in late hippocampal  
605 neurogenesis (6 Ki67, 8 DCx; Figure 3).

606

607 A new 0-1 “event scale” was fit linearly to span this extended range, by subtracting the  
608 timing of each developmental event from the earliest event and divided these values by  
609 the difference between the latest event and the earliest event. We fit a linear regression  
610 through log-transformed values for each species against the event scale. We use the fitted  
611 values from the regression of human developmental event timing versus the event scale  
612 to predict the timing of late stages of human hippocampal neurogenesis timing. We  
613 omitted developmental events capturing cortical neurogenesis because a subset of cortical  
614 cell types are generated later than expected in primates (Clancy et al., 2001; Charvet et  
615 al., 2017ab), which may increase error when predicting the duration of hippocampal  
616 neurogenesis across species.

617

## Comparing timetables of adult neurogenesis

618 We tested whether hippocampal neurogenesis occurs earlier than expected given the  
619 timing of other developmental events. We fit a linear model with the event scale as a  
620 continuous variable and developmental event timing as the response variable. To test  
621 whether limbic structures undergo neurogenesis earlier than expected relative to the  
622 timing of other events, we classified neurogenetic events as limbic or non-limbic. We  
623 tested whether the “limbic factor” as well as the interaction between the event scale and  
624 the “limbic factor” would account for a significant percentage of the variance.

625

### 626 **2.4 Single cell RNA sequencing to identify adult hippocampal neurogenesis**

627

628 Because adult neurogenesis has recently been disputed in humans (Sorrells et al., 2018),  
629 we investigated whether adult neurogenesis could be observed from single cell RNA  
630 sequencing data extracted from the human hippocampus and prefrontal cortex aged 40 to  
631 65 (Habib et al., 2017). We computed the relative number of cells expressing neural  
632 progenitor markers (DCX+, SOX2+, DPYSL3+) relative to the number of cells  
633 expressing PROX1+ in humans. We select PROX1 as a marker for granule cells because  
634 it is expressed by hippocampal granule cells but not by other cell types in the cortex. That  
635 is, the expression of PROX1 from bulk samples is higher in the hippocampus than in  
636 other cortical regions (Figure S1A) and PROX1 is expressed by hippocampal granule  
637 cells but not by isocortical cells (Figure S1B). We selected SOX2, DCX, and DPYSL3  
638 (aka TUC-4) because they are markers of immature neurons (Ngwenya et al., 2006;  
639 Cipriani et al., 2018). We considered PROX1 to be expressed if the gene count was  
640 greater than 0. To identify whether DCX+, SOX2+, and DPYSL3+ collocate with  
641 PROX1+ cells above chance level, we randomly reassigned PROX1 expression to  
642 different neuronal types 1,000 times. We then computed the number of DCX+, SOX2+,  
643 and DPYSL3+ cells relative to the number of PROX1+ cells. We assess whether the  
644 relative number of DCX+, SOX2+, +, and DPYSL3+ falls above the 95% confidence  
645 intervals generated from 1,000 permutations. Such an analysis permits investigating  
646 whether the number of immature neurons is present above chance level. Because we are  
647 focused on whether new neurons are generated in the adult hippocampus, we do not  
648 include cells belonging to clusters previously identified as glial, astrocytic, microglia, and  
649 endothelial. Data are from DroNc-Seq generated by Habib et al., 2017.

650

## 651 **3.0 Results**

652

### 653 **3.1 Initial characterization of late hippocampal neurogenesis**

654

655 The initial step is to characterize how the number of dividing progenitors (Ki67+ cells)  
656 and immature neurons (DCX+) relative to granule cell numbers vary with post-  
657 conceptional day. Figure 3 (A, C, E, and F) show the measured values of Ki67+ cells  
658 expressed as a percent of total granule cells versus days post-conception for the  
659 marmoset, mouse, macaque, and rat. Frames B and D show DCX+ labeled granule cells  
660 for marmoset and mouse only, again as a percent of total granule cells. Both scales are  
661 natural log scales, and the durations spanned vary considerably, from approximately 50 to  
662 250 days post conception in the mouse, versus approximately 150 to 3,000 days postnatal  
663 in macaque and marmoset. This enables calculating when the percentage of Ki67+ to

## Comparing timetables of adult neurogenesis

664 total granule cells reach 2%, 0.7%, 0.5%, 0.3%, 0.2%, and 0.1%, and when the  
665 percentage of DCX+ to total granule cells reach 3%, 2.5%, 2%, 1.5%, 1%, and 0.5% in  
666 each species. The range for each species was constrained so that the natural-logged  
667 values of the relative number of Ki67+ and DCX+ to total granule cells systematically  
668 decline with age. This approach permitted fitting a linear regression through the data.

669

### 670 **3.2 Addition of declining hippocampal neurogenesis values into the overall** 671 **maturational event scale.**

672

673 In Figure 3, hippocampal neurogenesis indicators are described with relation to post-  
674 conception day in each species, but we would like to know how the decline in  
675 hippocampal neurogenesis relates to the common progress of brain maturation across  
676 species. Two ways of presenting “translating time” data can be used. In Figure 4A, the  
677 new data on late hippocampal neurogenesis for marmoset, macaque and mouse, and the  
678 single rat point are plotted against the common “event scale”. This type of data  
679 representation is optimal for visualizing overall slope and intercept similarities and  
680 differences between multiple species. As expected, the species with long early  
681 neurodevelopment periods show longer periods of adult hippocampal neurogenesis. No  
682 truncations, breaks or sudden accelerations in any particular species are in evidence,  
683 though there are interesting differences in the maturational path in marmosets versus  
684 macaques we will address subsequently.

685

686 It is also possible to use the translating time scale to express the events of one species in  
687 the time frame of a second species, “translate” the approximately 130 modeled days of  
688 the macaque to the 50 days of a mouse, which facilitates close comparisons of delay or  
689 advance of any class of events between the selected species (Figure 4, B and C). For  
690 example, comparing nocturnal to diurnal mammals, the rods and other rod-related cells of  
691 the retina are generated later in nocturnal mammals, which would be visible in graphs  
692 like 4B and C as an elevation of rod-related points (nocturnal animals on the Y axis)  
693 (Dyer et al. 2009; Workman et al. 2013). In this case, we look for a difference in the  
694 implied intercept or slope of the “late hippocampal neurogenesis” points to determine if  
695 they show any signs of systematic variation from the common developmental scaling  
696 function. No such differences are apparent.

697

#### 698 **3.2.1. Marmoset developmental timing**

699

700 Early in development, equivalent events in marmosets occur later than in macaques  
701 (Figure 4A). At later time points, equivalent events occur earlier in marmosets than in  
702 macaques. A linear model with the event scale as a continuous variable and the logged  
703 values of developmental event timing as the predictor shows that the slope is lower in  
704 marmosets ( $y=1.27x+1.73$ , slope SE=0.037, intercept SE=0.02,  $R^2=0.976$ ,  $p<2.2e-16$ )  
705 than it is in macaques ( $y=1.89x+1.44$ , slope SE=0.056, intercept SE=0.016,  $R^2=0.903$ ;  
706  $p<2.2e-16$ ). In other words, marmosets initiate neural development late with respect to  
707 conception, close to day 90 compared to day 35 in macaques, but then progress through  
708 developmental events faster than macaques, producing a smaller brain by the end of  
709 neural development. The consequence of this late, accelerated developmental trajectory is

## Comparing timetables of adult neurogenesis

710 that hippocampal neurogenesis wanes earlier in marmosets than in macaques. This is  
711 similar to the pattern previously observed in precocial mammals like guinea pigs, spiny  
712 mouse and sheep (Workman et al., 2013) where neural development is delayed with  
713 respect to conception later, but once initiated, proceeds at a faster rate than in a number of  
714 altricial species.

715

### 716 **3.2.2. Somewhat earlier termination of limbic neurogenesis in the macaque**

717

718 The large sample size in macaques allows us to test whether limbic neurogenesis occurs  
719 earlier relative to the timing of other events in macaques (Figure 5). To that end, we fit a  
720 linear model with the logged values of developmental event timing as the predictor, the  
721 event scale as a continuous variable and a discrete categorical variable that classifies  
722 neurogenetic events as limbic or not. We also tested whether the interaction between the  
723 “limbic” factor and the event scale accounts for a significant percentage of the variance.  
724 The fitted model accounts for a significant percentage of the variance in developmental  
725 event timing for macaques ( $F=416.7$ ;  $R^2=0.91$ ). The limbic factor is not significant  
726 ( $F=2.065$ ;  $p=0.15$ ) but the interaction between the limbic factor and the event scale is  
727 significant for macaques ( $F=11.92$ ;  $p<0.05$ ). These data demonstrate that the slope of the  
728 natural-logged values of late hippocampal neurogenesis versus the event scale is lower  
729 than expected in macaques considering the timing of other developmental events. In other  
730 words, hippocampal neurogenesis may cease slightly earlier than expected in macaques  
731 compared with rodents.

732

### 733 **3.2.3 Hippocampal neurogenesis in humans**

734

735 For humans, a linear regression of the timing of reported developmental milestones versus the  
736 event scale computed for humans by the translating time model (Workman et al., 2013) is plotted  
737 for the reduced dataset we used in this model, as a visual check and demonstration of the  
738 predictability of human data points, in Figure 6A. No new data are introduced in Figure 6A; its  
739 intention is only to show the baseline variability against which we might introduce and compare  
740 other data. ( $y=2.44x+1.53$ ; slope SE=0.12; intercept SE=0.04,  $R^2=0.85$ ,  $p < 2.2e-16$ ). We then  
741 extrapolated predicted values from the linear model to see how late stages of hippocampal  
742 neurogenesis should vary if the timing of hippocampal neurogenesis were conserved across  
743 humans and mice (Solid lines, Figures 6B and 6C) According to these predictions from mice ,  
744 human hippocampal neurogenesis as assessed from the relative number of Ki67+ and DCX+  
745 cells should drop sharply between prenatal stages up until to 8-26 years of age and subsequently  
746 remain relatively invariant at later time points (Figure 6B). More specifically, the percentage of  
747 Ki67+ to total granule cells should drop up until about 8 to 26 years of age (post-conception day  
748 3,000 to 10,000; Figure 6) and remain relatively invariant thereafter. Similarly, the relative  
749 number of DCX to total granule cells should drop from birth to about 8 to 26 years of age (post-  
750 conception day 3,000 to 10,000; Figure 6C).

751

752 On these predicted functions, we overlay the number of DCX+ and Ki67+ cells compared to  
753 total granule cells as reported by Boldrini et al., 2018. Our predictions are very generally  
754 consistent with those of Boldrini et al., in that we predict that both markers should remain  
755 relatively invariant from 8-26 years of age onward, but the added data do appear more variable,

## Comparing timetables of adult neurogenesis

756 and the Ki67+ cell numbers higher than would be expected. Other data potentially addressing  
757 this timetable, that of Sorrells et al. (2018), could not be plotted against this representation  
758 because number of proliferative cells/mm<sup>2</sup> was assessed rather than relative to the total granule  
759 cell numbers determined in the rodent studies.

760

761 To investigate whether hippocampal neurogenesis timing in humans should deviate from  
762 that of rodents, we compare temporal changes in DCX expression in humans and mice.  
763 These data offer a slightly different perspective on the temporal pattern of late stages of  
764 hippocampal neurogenesis between species. We first note similarities between DCX  
765 RNA expression and the relative number of immature hippocampal granule cells assayed  
766 from single cell RNA sequencing data (Figure S2). A qualitative investigation of DCX  
767 expression from multiple datasets in mice suggests that RNA sequencing from bulk data  
768 mirrors the temporal changes in the relative number of immature granule cells. As the  
769 relative number of granule cells declines in mice, DCX expression from bulk samples  
770 also declines sharply. At roughly 38 to 50 days post-conception, the relative number of  
771 immature granule cells varies relatively compared to earlier time points. That is, DCX  
772 expression is relatively invariant from 1 month to 4 months of age in mice. In humans,  
773 DCX expression also decreases from prenatal time points up until around post-conception  
774 316 (50 days after birth) and subsequently remains relatively invariant. According to the  
775 translating time model, 38 to 50 days post-conception in mice is roughly equivalent to  
776 445 to 700 days post-conception in humans. In other words, the end in the abrupt decline  
777 in DCX expression might occur slightly earlier than expected in humans.

778

779 Because the presence of hippocampal neurogenesis has recently been questioned, we  
780 investigate whether hippocampal neurogenesis can be observed from single cell RNA  
781 sequencing obtained from the human hippocampus and prefrontal cortex (Figure 7A). We  
782 compare the number of cells expressing DPYSL3, DCX, and SOX2 relative to the  
783 number of PROX1 cells (Figure 7 B-E). PROX1 is used as a marker of hippocampal  
784 granule cells and its expression is observed in previously identified excitatory  
785 hippocampal granule cells (cluster 8) and GABAergic cells (cluster 7). We computed the  
786 number of DCX+, SOX2+, and DPYSL3+ cells relative to the number of PROX1+ cells.  
787 We assess whether these values lie above chance level by comparing these values to  
788 those generated by permutation-based significance thresholds. Such an analysis shows  
789 that the SOX2+ and DPYSL3+ cell numbers relative to PROX1+ cell numbers occurs  
790 above the 99% confidence intervals of distributions generated from permutations (Figure  
791 7 F-H). However, the number of DCX+ to PROX1+ cells falls within the 99% confidence  
792 intervals generated from permutations. These findings suggest that human hippocampal  
793 neurogenesis is present at low but detectable numbers in the adult human brain but that  
794 DCX expression may drop to such low levels in adulthood that human hippocampal  
795 neurogenesis may be difficult to conclusively identify with DCX RNA expression.

796

797



## Comparing timetables of adult neurogenesis

### 798 **4.0 Discussion**

799

#### 800 **4.1 Late hippocampal neurogenesis as an extension of development**

801

802 When the dates and magnitudes of the long tail of declining late hippocampal  
803 neurogenesis are represented on the common maturational scale of the translating time  
804 procedure, it is clear that these events are continuous with early hippocampal  
805 neurogenesis, with little or no convincing evidence or hints of breaks or inflections. The  
806 translation of a maturational state to a particular duration of development is consistent  
807 with the normal translation seen in smaller versus larger brains.

808

809 A structural correlate of duration of neurogenesis in the embryonic brain lends additional  
810 support to the conclusion that late hippocampal neurogenesis is an aspect of  
811 developmental neurogenesis in the brain. The embryonic brain first appears as a plate,  
812 with its caudal-to-rostral dimension comprised of repeating segments, the familiar spinal  
813 segments which undergo relatively little reorganization from embryo to adult,  
814 rhombomeres to the level of the midbrain (Lumsden, 1996), and prosomeres in the  
815 telencephalon (Puelles et al., 2013; Albuixech-Crespo et al., 2018). The rhombomeric  
816 and prosomeric segments have repeating structural similarities, but undergo prolonged  
817 neurogenesis compared to the spinal cord, producing major changes in their appearance  
818 due to simple mass of neurons and neuronal migration. Important for the present  
819 purposes, the basal-to-alar dimension of the original neural plate is also a gradient of  
820 duration of neurogenesis, shortest medially and longest laterally corresponding to, but not  
821 completely accounting for the number of neurons in each segment derived from each  
822 germinal position (Finlay et al., 1998; Workman et al., 2013) At the most lateral margin  
823 of the most anterior segments that produce the pallium, we find the zones that generate  
824 the olfactory bulb, the hippocampus, and the neocortex. This region collectively  
825 generates neurons for the longest duration, the first two continuing to add neurons well  
826 past the early developmental period. Thus, extended neurogenesis is a feature of the  
827 embryonic origin of the hippocampus, not a feature applied to an unpredictable location.

828

##### 829 **4.1.1 Limitations of the database**

830 Several caveats are in order, some about the translating time approach in general, and  
831 some about the particular procedures we used to incorporate this atypical corpus of data.  
832 While the translating time database is presently the only source integrating multiple  
833 aspects of developmental information over a large number of species, from a  
834 phylogenetic perspective, those species are anything but systematically or randomly  
835 chosen, featuring a large number of rodents and marsupials, relatively few primates, with  
836 the first New World primate appearing with this article, few large ungulates or carnivores  
837 and no cetaceans. As additions of new taxonomic groups or functionally defined groups,  
838 such as the precocial mammals in Workman et al. (2013) typically reveal new ways that  
839 neural development can be altered, blanket statements about “mammalian” neurogenesis  
840 should be avoided. So far, however, a few generalities can be made. Neurogenesis can  
841 begin very rapidly after the completion of the early germinal tissue, or it can be delayed  
842 while other tissues begin proliferation as is seen in some precocial mammals, but it  
843 always moves *en bloc*, and we have never observed breaks introduced into the overall

## Comparing timetables of adult neurogenesis

844 sequence, as none were observed in this analysis. The onset and offset of neurogenesis in  
845 identified groups can be shifted, most frequently seen for the limbic versus neocortex  
846 shift described earlier, a neural variation extending back to sharks and rays (Finlay and  
847 Darlington, 1995; Reep et al., 2007, Yopak et al., 2010). Finally, while duration of  
848 neurogenesis is a very important aspect of brain evolution, it is important to keep in mind  
849 it is not the only source of variation, with medial-lateral axis location, for example, only  
850 accounting for about 50% of the variance in neuron number (Finlay et al., 1998).

851  
852 We estimated the relative timing of the decline in hippocampal neurogenesis not by a  
853 complete recomputation of the model to include the new observations, but rather by  
854 extrapolating the former model, duration extending almost by a factor of 2 in mice and  
855 more in the larger species, a substantial amount. It is possible that this procedure could  
856 mis-estimate the slope of the decline fairly substantially, but it seemed reasonable to  
857 attempt a first description. We did note that macaques appeared to begin initial  
858 hippocampal neurogenesis slightly earlier and end earlier than expected given the timing  
859 of surrounding, non-hippocampal events. Ideally, other late developmental events should  
860 be used to anchor these observations, at which point the overall model will be  
861 recalculated, but defined points become harder to identify in later development.  
862 Continued reduction of neuron density in most structures in later development as well as  
863 spatiotemporal changes in RNA expression are potential candidates, but these approaches  
864 have rarely been employed systematically across a broad range of species.

865

### 866 **4.2 Developmental timing in marmosets**

867

868 The inclusion of marmosets in the present study was intended to allow better  
869 comparisons between primate species, particularly because information on late  
870 hippocampal neurogenesis was available for it. We were somewhat thwarted in this  
871 enterprise, however, because we did not observe the simple translation for production of  
872 a smaller brain expected from the pattern laid out in rhesus macaques. Rather, early  
873 developmental events were delayed with respect to conception, then maturation  
874 proceeded rapidly, consistent with the marmoset's smaller brain, and finally, late  
875 developmental events occurred earlier than predicted. A delay followed by rapid  
876 maturation was a pattern we had observed before, however, in precocial rodents and  
877 ungulates (Workman et al., 2013). Why the rate of neural development does not simply  
878 slow to take advantage of the extra time *in utero* is unclear. We have not yet observed  
879 any case of slowing of rate of neural production in eutherian mammals, although  
880 marsupials generate neural tissue at a slower rate overall (Darlington et al., 1999).  
881 Marmosets do have small brains compared to macaques, and perhaps to have time to  
882 generate the body, it is necessary to delay the onset of generation of the brain, to avoid  
883 producing a post-mature brain while still *in utero* if no change in its rate of development  
884 is possible. In a prior study of retinal neurogenesis in the owl monkey, *Aotus*, compared  
885 to the capuchin monkey *Cebus apella*, we had notice that gestational lengths were longer  
886 than we had anticipated from earlier work in Old World monkeys (Dyer et al., 2007).  
887 The reason for this potential difference in life history parameters will require more  
888 observations in the marmoset, and other New World monkeys as well.

889

## Comparing timetables of adult neurogenesis

### 890 **4.2.2 The timing of late stages of human hippocampal neurogenesis and the** 891 **problems of detecting rare events**

892

893 We used the timing of developmental transformation across non-human mammalian  
894 species to predict the timing of late stages of hippocampal neurogenesis in humans. If the  
895 timing of hippocampal neurogenesis is conserved across humans, marmosets, and  
896 rodents, hippocampal neurogenesis as assessed from the relative number of DCX+ and  
897 Ki67+ to total granule cells should drop sharply up until 8-26 years of age and remain  
898 low and invariant at later time points. Sorrells et al., 2018 showed that the relative  
899 number of Ki67+ and DCX+ cells drop sharply during childhood up until 7 to 13 years of  
900 age, consistent with our predictions in humans. The question is whether human  
901 hippocampal neurogenesis ends earlier than expected given the developmental  
902 allometries of late developmental events. It is presently difficult to determine whether  
903 human hippocampal neurogenesis does indeed deviate from predictions generated from  
904 rodents. However, the work of Boldrini et al., 2018, using similar techniques  
905 demonstrates low and invariant human hippocampal neurogenesis between the ages of 14  
906 to 79 years, but a markedly higher incidence than the prior studies.

907

908 We found inconsistent evidence for late hippocampal neurogenesis in humans within our  
909 own study. Our analysis of RNA sequences from single cells showed that the relative  
910 number of immature neurons to PROX1 (i.e., a marker of granule cells) were observed at  
911 greater than chance levels in adult humans. However, the relative number of  
912 DCX+/PROX1 is unusually low and fell below chance levels as assessed from our  
913 permutation-based significance thresholds. Whether DCX expression is expressed at high  
914 enough levels for it to be reliably detected in the adult human brain is unclear. Although  
915 the number of potential confounds to detection of immature neurons are many, including  
916 retention of immature neuron morphology in displaced populations until adulthood  
917 (Piumatti et al., 2018); unusual levels of genetic variation (Kaushal et al., 2003) as well  
918 as all of the problems of processing of human tissue, developmental scaling plays a role  
919 as well.

920

921 As mentioned at the outset of this discussion, different components of the same tissue  
922 may scale in altogether different ways with respect to brain size and developmental  
923 duration. As a rule of thumb, with the usual number of exceptions, cell-based properties  
924 do not scale with brain size or developmental duration. As cells essentially depend on  
925 diffusion for many critical metabolic factors, in at least one plane of section, neuron  
926 diameter cannot scale with brain size (long axons, but not fat ones, are acceptable).  
927 Oxidative metabolism, action potentials and most other cellular processes ignore animal  
928 mass. How about the cell cycle? The cell cycles of initial neurogenesis take similar  
929 amounts of time in small and large brains (Takahashi et al., 1994; Charvet and Striedter,  
930 2008). The duration of the cell cycle becomes longer and longer as maturation proceeds,  
931 not by uniform elongation of every part, but particularly the quiescent period; in addition,  
932 fewer and fewer cells contribute to the cell cycle (Takahashi et al., 1994; Kornack and  
933 Rakic., 2008; Charvet and Striedter, 2008). We have claimed, though, that the  
934 termination of hippocampal neurogenesis looks quite similar in its overall envelope  
935 across the rodents, monkeys and the human we measured. This is with respect to these

## Comparing timetables of adult neurogenesis

936 animals' maturational state, however, not their age in days. A back-of-napkin calculation  
937 of the duration of equivalent maturational periods from early "childhood" to death would  
938 be about 700 days for rats and about 25,000 days for a human. The initial spatial  
939 densities for Ki67 and DCX+ are roughly similar (Figure 3). It seems unlikely that  
940 generating a neuron would require 36 times longer in humans, or that the features of a  
941 young neuron would persist a similar long duration. On the other hand, the migration and  
942 integration of new neurons into circuits has been reported to take very much longer in  
943 adults, exceeding six months (Kohler et al., 2011). Thus, an empirical question remains,  
944 as it is unclear if these gene patterns represent a maintained state, or a transitory event. If  
945 they are time-limited events, the chance of registering such an event in the slice of time  
946 caught by a brain slice will be radically different in short- and long-lived mammals, and  
947 comparisons must take these basic scaling features into account.  
948  
949  
950

## Comparing timetables of adult neurogenesis

### 951 **Acknowledgements**

952 RNA sequencing data from human hippocampi were taken from the Allen Institute  
953 Website, which are supported by the NIH Contract HHSN-271-2008-00047-C to the  
954 Allen Institute for Brain Science. The opinions in this article are not necessarily those of  
955 the NIH. We thank Dr. Marnin Wolfe for helpful statistical discussions.

956

### 957 **Funding**

958 This work is supported by an NIH CHHD 1F32HD067011-01A1 fellowship to CJC as  
959 well as an NSF grant, and by research chair support from the W.R.Kenan Jr. Charitable  
960 Trust to BLF.

961

### 962 **Author Contributions Statement**

963 BF and CC designed the study, analyzed the data, and wrote the study. All authors read  
964 and approved the manuscript.

965

### 966 **Conflict of Interest Statement**

967 The authors have no conflicts of interest

968



## Comparing timetables of adult neurogenesis

### 969 **Figure legends**

970

#### 971 **Figure 1**

972 Redrawn from Figure 2 in Hofman, 1989. Outer cortical surface area is plotted as a  
973 function of brain volume on a logarithmic scale. The slope of the standard major axis is  
974  $0.727 \pm 0.009$ . The dashed line represents the scaling of the cortical surface area  
975 according to a two-thirds power relation (the necessary geometric similarity of plotting an  
976 area against a volume if both increase linearly). Dolphins and whales are indicated by  
977 circles.

978

#### 979 **Figure 2**

980 Predicted developmental schedules for human (blue circle), macaque (red diamonds), cat  
981 (purple circle), short-tailed opossum (grey circle), and mouse (black diamonds), selected  
982 from 18 species to illustrate the full range of developmental durations. This figure is  
983 modified from Workman et al., 2013. In this graph the event scale is the x-axis, to which  
984 we have added a subset of the 271 events that were observed. The event scale is a  
985 common ordering of developmental events across all species and ranges from 0 to 1. The  
986 y-axis is the estimated date of occurrence of each event in each species from conception  
987 (log scale). To determine when a particular event would be predicted to occur in any  
988 species from this graph, using the name of the event on the event scale, find where it  
989 intersects the regression line for that particular species. The y-axis value will be the  
990 predicted PC day for that event/species combination. Also represented on this graph are  
991 interaction terms for corticogenesis and retinogenesis, with interaction terms always  
992 associated with individual species. The parallel lines for a subset of events in four of the  
993 species (black bordered circles for human, macaque, cat, and possum) represent delays in  
994 cortical neurogenesis with respect to their time of occurrence in the rodent and rabbit. In  
995 the cat, a second parallel line can be seen representing the delay of retinal neurogenesis  
996 relative to the timing of other transformations (purple circle with a black dot). dLGN:  
997 dorsal lateral geniculate nucleus.

998

999 **Figure 3.** The natural-logged values of DCX+ and Ki67+ cell numbers relative to  
1000 hippocampal granule cell numbers are plotted against the natural-logged values of age in  
1001 days post-conception in (A-B) marmosets, (C-D) mice, (E) macaques, and (F) rats. We  
1002 performed a linear regression through these values to identify when the relative number  
1003 of Ki67+ cells reaches 0.7, 0.5, 0.3, 0.2 and 0.1% of the total granule cell population. We  
1004 also identify when DCX cell numbers reach 3, 2.5, 2, and 1.5% of the total granule cell  
1005 population. With the exception of the marmoset, the relative number of DCX+ and Ki67+  
1006 to total granule cells were averaged at each age. (G) We use single cell RNA seq to  
1007 compute the number of immature granule cells relative to hippocampal neurons over the  
1008 course of prenatal and postnatal development in mice. (H) Such an analysis shows that  
1009 DCX+/granule cell numbers of mice fall within the 99% confidence intervals generated  
1010 from single cell RNA seq data. These findings demonstrate strong concordance between  
1011 methods. Data are from Merrill et al., 2003; Rao et al., 2006; Jabès et al., 2010, Ben  
1012 Abdallah et al., 2010; Amrein et al., 2015, and Amrein et al., 2011. Data from single cell  
1013 RNA seq are from Hochgerner et al., 2018. Regressions were generated with software  
1014 package IGOR.

## Comparing timetables of adult neurogenesis

1015

1016 **Figure 4** (A) The timing of developmental events is plotted against an event scale in  
1017 macaques, marmosets, rats, and mice. The timing of hippocampal neurogenesis was  
1018 extrapolated from regressions capturing the decline in the number of DCX and Ki67+  
1019 cells relative to hippocampal granule cell numbers in primates and rodents. The timing of  
1020 developmental events in macaques (B) and marmosets (C) are plotted against those in  
1021 rats. (B-C) Developmental time points capturing late stages of hippocampal neurogenesis  
1022 are highlighted (x).

1023

1024 **Figure 5.** Developmental milestones are plotted against the event scale in marmosets (A)  
1025 and macaques (B). Milestones that capture the timing of limbic neurogenesis are in dark  
1026 blue (marmosets) and in dark red (macaque). We fit a linear regression through the  
1027 logged values of the timing of developmental milestones against the event scale. Late  
1028 hippocampal neurogenesis consistently falls below the regression. In other words, late  
1029 hippocampal neurogenesis may occur earlier than expected given the timing of most  
1030 developmental milestones in macaques.

1031

1032 **Figure 6.** (A) The timing of developmental milestones in humans are plotted against the  
1033 event scale. We fit a regression through the timing of developmental transformations  
1034 against age in days post-conception. We use this regression to predict the decline in late  
1035 hippocampal neurogenesis in humans. (B\_C) The number of Ki67+ (B) and DCX+ (C)  
1036 cells relative to the total granule cell population is predicted to decline sharply during  
1037 childhood in humans.

1038

1039 **Figure 7.** (A) t\_SNE plots of RNA expression from single cells extracted from the  
1040 hippocampus and the prefrontal cortex of the human brain identifies clusters of cell  
1041 populations. (B) PROX1 is used as a marker of hippocampal granule cells and its  
1042 expression is observed in previously identified excitatory hippocampal granule cells  
1043 (cluster 8) and GABAergic cells (cluster 7). (C) PROX1 co-localizes with genes  
1044 expressed by immature neurons ((D) DPYSL3 (E) DCX (F) SOX2), which suggests that  
1045 new granule cells are born in the human hippocampus. To identify whether DCX+,  
1046 SOX2+, and DPYSL3+ collocate with PROX1+ cells above chance level, we randomly  
1047 reassigned PROX1 expression to different neuronal types 1,000 times. We then extracted  
1048 the number of DCX+, SOX2+, and DPYSL3+ cells relative to the number of PROX1+  
1049 cells 1000 times (F-H). Such an analysis shows that the SOX2+ (F) and DPYSL3+ (H)  
1050 cell numbers relative to PROX1+ cell numbers occurs above the 99% confidence  
1051 intervals generated from permutations. However, the number of DCX+ to PROX1+ cells  
1052 falls within the 99% confidence intervals generated from permutations (G). We removed  
1053 cells belonging to clusters 9-15 from the analyses because they are identified as glia,  
1054 astrocytic, microglia, and endothelial cell populations. We omit these cell types because  
1055 our analysis is focused on identifying whether neurons rather than glial and endothelial  
1056 cells are generated in the adult hippocampus. Data and identified clusters are from  
1057 DroNc-Seq generated by Habib et al., 2017. Abbreviations: NSC: neural stem cells;  
1058 exPFC: excitatory neurons in the prefrontal cortex; exCA1-3: excitatory neurons in CA1-  
1059 3; exDG: excitatory neurons in dentate gyrus; ODC: oligodendrocytes; ASC: astrocytes;  
1060 OPC: oligodendrocyte progenitors; MG: microglia; END: endothelial cells.

1061

## Comparing timetables of adult neurogenesis

### 1062 **References**

- 1063 Andreae, L. C. (2018). Adult neurogenesis in humans: Dogma overturned, again and  
1064 again?. *Science Translational Medicine* 10, eaat3893.
- 1065 Albuixech-Crespo, B., López-Blanch, L., Burguera, D., Maeso, I., Sánchez-Arrones, L.,  
1066 Moreno-Bravo, J. A., et al. (2017). Molecular regionalization of the developing  
1067 amphioxus neural tube challenges major partitions of the vertebrate brain. *PLoS*  
1068 *biology* 15, e2001573.
- 1069 Amrein, I., Nosswitz, M., Slomianka, L., van Dijk, R. M., Engler, S., Klaus, F., et al.  
1070 (2015). Septo-temporal distribution and lineage progression of hippocampal  
1071 neurogenesis in a primate (*Callithrix jacchus*) in comparison to mice. *Front.*  
1072 *Neuroanat.* 9, 85.
- 1073 Amrein, I., Isler, K., and Lipp, H. P. (2011). Comparing adult hippocampal neurogenesis  
1074 in mammalian species and orders: influence of chronological age and life history  
1075 stage. *Eur. J. Neurosci.* 34, 978-987.
- 1076 Barton, R. A., and Venditti, C. (2013). Human frontal lobes are not relatively large. *Proc.*  
1077 *Natl. Acad. Sci. U. S. A.* 110, 9001-9006. Doi: 10.1073/pnas.1215723110
- 1078 Ben Abdallah, N. M., Slomianka, L., Vyssotski, A. L., and Lipp, H. P. (2010). Early  
1079 age-related changes in adult hippocampal neurogenesis in C57 mice. *Neurobiol.*  
1080 *Aging* 31, 151-161.
- 1081 Boldrini, M., Fulmore, C. A., Tartt, A. N., Simeon, L. R., Pavlova, I., Puposka, V., et al.  
1082 (2018). Human hippocampal neurogenesis persists throughout aging. *Cell Stem*  
1083 *Cell.* 22, 589-599.
- 1084 Cahalane, D., Charvet, C.J., and Finlay, B.L. (2014). Modeling local and cross-species  
1085 neuron number variations in the cerebral cortex as arising from a common  
1086 mechanism. *Proc. Natl. Acad. Sci. U.S.A.* 111, 17642–17647.  
1087 <https://doi.org/10.1073/pnas.1409271111>
- 1088 Chaplin, T. A., H-H. Yu, J.G., Soares, Gatass, R., and Rosa, M.G.P. (2013). A conserved  
1089 pattern of differential expansion of cortical areas in simian primates. *J. Neurosci.*  
1090 33, 15120-15125. doi: 10.1523/jneurosci.2909-13.2013
- 1091 Charvet, C.J., Cahalane, D.J., and Finlay, B. L. (2015) Systematic, cross-cortex variation  
1092 in neuron numbers in rodents and primates. *Cereb. Cortex* 25, 147-160.  
1093 doi:10.1093/cercor/bht214
- 1094 Charvet, C.J., Darlington, R.B., and Finlay, B. L. (2013) Variation in human brains may  
1095 facilitate evolutionary change toward a limited range of phenotypes. *Brain Behav.*  
1096 *Evol.* 81, 74-85 doi:10.1159/000345940
- 1097 Charvet, C.J., and Finlay, B.L (2014). Evo-devo and the primate isocortex: the central  
1098 organizing role of intrinsic gradients of neurogenesis. *Brain, Behav. Evol.* 84, 81-  
1099 92 doi: 10.1159/000365181
- 1100 Charvet, C. J., Hof, P. R., Raghanti, M. A., Kouwe, A. J., Sherwood, C. C., and  
1101 Takahashi, E. (2017a). Combining diffusion magnetic resonance tractography  
1102 with stereology highlights increased cross-cortical integration in primates. *J.*  
1103 *Comp. Neurol.* 525, 1075-1093. <https://doi.org/10.1002/cne.24115>
- 1104 Charvet, C. J., Šimić, G., Kostović, I., Knezović, V., Vukšić, M., Leko, M. B., et al.  
1105 (2017b). Coevolution in the timing of GABAergic and pyramidal neuron  
1106 maturation in primates. *Proc. R. Soc. B.* 284, 20171169.  
1107 <http://dx.doi.org/10.1098/rspb.2017.1169>.

## Comparing timetables of adult neurogenesis

- 1108 Charvet, C. J., and Striedter, G. F. (2008). Developmental species differences in brain  
1109 cell cycle rates between northern bobwhite quail (*Colinus virginianus*) and  
1110 parakeets (*Melopsittacus undulatus*): implications for mosaic brain evolution.  
1111 *Brain Behav. Evol.* 72, 295-306.
- 1112 Charvet, C. J., and Striedter, G. F. (2010). Bigger brains cycle faster before neurogenesis  
1113 begins: a comparison of brain development between chickens and bobwhite quail.  
1114 *Proc. R. Soc. B.* 277, 3469-3475.
- 1115 Cipriani, S., Ferrer, I., Aronica, E., Kovacs, G. G., Verney, C., Nardelli, J., et al. (2018).  
1116 Hippocampal Radial Glial Subtypes and Their Neurogenic Potential in Human  
1117 Fetuses and Healthy and Alzheimer's Disease Adults. *Cereb. Cortex* 28, 2458-  
1118 2478.
- 1119 Clancy, B., Darlington, R.B., and Finlay, B.L. (2000). The course of human events:  
1120 predicting the timing of primate neural development. *Dev. Sci.* 3, 57-66
- 1121 Clancy, B., Darlington, R.B., and Finlay, B.L. (2001). Translating developmental time  
1122 across mammalian species. *Neurosci* 105, 7-17 doi.org/10.1016/S0306-  
1123 4522(01)00171-3
- 1124 Clancy, B., Kersh, B., Hyde, J., Anand, K.J.S, Darlington, R.B., and Finlay, B.L. (2007).  
1125 Web-based method for translating neurodevelopment from laboratory species to  
1126 humans. *Neuroinformat.* 5, 79-94 doi.org/10.1385/NI:5:1:79
- 1127 Darlington, R.B., Dunlop, S.A., and Finlay, B.L. (1999). Neural development in  
1128 metatherian and eutherian mammals: variation and constraint. *J. Comp. Neurol.*  
1129 411, 359-368
- 1130 Dennis, C. V., Suh, L. S., Rodriguez, M. L., Kril, J. J., and Sutherland, G. T. (2016).  
1131 Human adult neurogenesis across the ages: an immunohistochemical study.  
1132 *Neuropathol Appl. Neurobiol.* 42, 621-638.
- 1133 Dyer, M.A., Martins, R., da Silva Filho, M., Muniz, J.A., Silveira, L.C.L., Cepko, C., and  
1134 Finlay, B.L. (2009). Developmental sources of conservation and variation in the  
1135 evolution of the primate eye. *Proc. Natl. Acad. Sci. U. S. A.* 106, 8963 – 8968.
- 1136 Fan, X., Dong, J., Zhong, S., Wei, Y., Wu, Q., Yan, L., et al. (2018). Spatial  
1137 transcriptomic survey of human embryonic cerebral cortex by single-cell RNA-  
1138 seq analysis. *Cell research* 28, 730–745.
- 1139 Finlay, B.L., and Clancy, B. (2008) ‘Chronology of the development of the mouse visual  
1140 system.’ *Eye, Retina and Visual System of the Mouse* L. Chalupa and R.W.  
1141 Williams, eds. (MIT Press: Cambridge, MA). pp 257-265
- 1142 Finlay, B.L., and Darlington, R.B. (1995). Linked regularities in the development and  
1143 evolution of mammalian brains. *Science* 268, 1578-1584 doi:  
1144 10.1126/science.7777856
- 1145 Finlay, B.L., Darlington, R.D. and Nicastro, N. (2001). Developmental structure of brain  
1146 evolution. *Behav. Brain Sci.* 24, 263-308 doi:10.1017/S0140525X01003958
- 1147 Finlay, B.L., Hersman, M.N., and Darlington, R.B. (1998). Patterns of vertebrate  
1148 neurogenesis and the paths of vertebrate evolution. *Brain Behav. Evol.* 52, 232-  
1149 242
- 1150 Finlay, B.L., Hinz, F., and Darlington R.B. (2011). Mapping behavioral evolution onto  
1151 brain evolution: The strategic roles of conserved organization in individuals and  
1152 species. *Phil. Trans. Roy. Soc. B.* 366, 2111-2123 doi:10.1098/rstb.2010.0344

## Comparing timetables of adult neurogenesis

- 1153 Finlay, B.L. and Workman, A.J. (2013). Human exceptionalism. *Trends Cogn. Sci.* 17,  
1154 199-201 doi: 10.1016/j.tics.2013.03.00
- 1155 Finlay, B.L. and Uchiyama, R. (2017). “The timing of brain maturation, early experience,  
1156 and the human social niche.” In: Kaas, J (ed.), *Evolution of Nervous Systems 2e.*  
1157 vol. 3, pp. 123–148. Oxford: Elsevier.
- 1158 Fleagle, J. G. (1984). ‘Size and adaptation in primates.’ *The Lesser Apes: Evolutionary*  
1159 *and Behavioral Biology*. H. Preuschoft, D. Chivers, W. Brockelman and N. Creel.  
1160 Edinburgh, Edinburgh University Press: 1-19.
- 1161 Freckleton, R.P., Harvey, P.H., and Pagel, M. (2002).. Phylogenetic analysis and  
1162 comparative data: a test and review of evidence. *Am. Nat.* 160, 712–726.
- 1163 Garwicz, M., Christiansen, M., and Psouni, E. (2009). A unifying model for timing of  
1164 walking onset in humans and other mammals. *Proc. Natl. Acad. Sci. U. S. A.* 106,  
1165 21889-21893. <https://doi.org/10.1073/pnas.0905777106>
- 1166 Gould, S. J. (1975). “Allometry in primates, with emphasis on scaling and the evolution  
1167 of the brain.” *Approaches to Primate Paleobiology*. Szalay. Basel, Karger. 5, 244-  
1168 292.
- 1169 Habib, N., Avraham-Davidi, I., Basu, A., Burks, T., Shekhar, K., Hofree, M., et al.  
1170 (2017). Massively parallel single-nucleus RNA-seq with DroNc-seq. *Nature*  
1171 *methods* 14, 955.
- 1172 Halley, A. C. (2016). Prenatal brain-body allometry in mammals. *Brain Behav. Evol.* 88,  
1173 14-24. <https://doi.org/10.1159/000447254>
- 1174 Halley, A. C. (2017). Minimal variation in eutherian brain growth rates during fetal  
1175 neurogenesis. *Proc. Roy. Soc. B*: 284, pii: 20170219. . DOI:  
1176 10.1098/rspb.2017.0219
- 1177 Hawkes, K. and Finlay, B.L. (2018). Mammalian brain development and the evolution of  
1178 our grandmothing life history. *Physiol. Beh.* 193, 55-68.  
1179 <https://doi.org/10.1016/j.physbeh.2018.01.013>
- 1180 Herculano-Houzel S., Collins C.E., Wong P., and Kaas, J.H. (2007) Cellular scaling rules  
1181 for primate brains. *Proc. Natl. Acad. Sci. U.S.A.* 104, 3562–3567 doi:  
1182 10.1073/pnas.0611396104
- 1183 Hikishima, K., Sawada, K., Murayama, A. Y., Komaki, Y., Kawai, K., Sato, N., et al.  
1184 (2013). Atlas of the developing brain of the marmoset monkey constructed using  
1185 magnetic resonance histology. *Neurosci.* 230, 102-113.
- 1186 Hochgerner, H., Zeisel, A., Lönnerberg, P., and Linnarsson, S. (2018). Conserved  
1187 properties of dentate gyrus neurogenesis across postnatal development revealed  
1188 by single-cell RNA sequencing. *Nat. Neurosci.* 21, 290-299.
- 1189 Hofman, M. A. (1989). On the evolution and geometry of the brain in mammals. *Prog.*  
1190 *Neurobiol.* 32, 137-158.
- 1191 Iacono, G., Benevento, M., Dubos, A., Herault, Y., Bokhoven, H., Kasri, N.N. and  
1192 Stunnenberg, H.G. (2017). Integrated transcriptional analysis unveils the  
1193 dynamics of cellular differentiation in the developing mouse hippocampus. *Sci*  
1194 *Rep* 7, 18073.
- 1195 Jabès, A., Lavenex, P. B., Amaral, D. G., and Lavenex, P. (2010). Quantitative analysis  
1196 of postnatal neurogenesis and neuron number in the macaque monkey dentate  
1197 gyrus. *Eur. J. Neurosci.* 31, 273-285.



## Comparing timetables of adult neurogenesis

- 1198 Jerison, H. J. (1973). *Evolution of the Brain and Intelligence*. New York, Academic  
1199 Press.
- 1200 Jerison, H. J. (1989). Brain size and the evolution of mind. The 59th James Arthur  
1201 Lecture on the Evolution of the Human Brain 1991: 1-99.
- 1202 Jerison, H. J. (1997). "Evolution of prefrontal cortex." *Development of the Prefrontal*  
1203 *Cortex: Evolution, Neurobiology and Behavior*. N. A. Krasnegor, G. R. Lyon and  
1204 P. S. Goldman-Rakic. Baltimore, Pall H. Brooks Publishing Co.: 9-26.
- 1205 Kaas J.H., and Herculano-Houzel, S. (2017) "What Makes the Human Brain Special: Key  
1206 Features of Brain and Neocortex". In: Opris I., Casanova M. (eds) *The Physics of*  
1207 *the Mind and Brain Disorders*. Springer Series in Cognitive and Neural Systems,  
1208 vol 11. Springer, Cham [https://doi.org/10.1007/978-3-319-29674-6\\_1](https://doi.org/10.1007/978-3-319-29674-6_1)
- 1209 Kaushal, D., Contos, J. J., Treuner, K., Yang, A. H., Kingsbury, M. A., Rehen, S. K. et al.  
1210 (2003). Alteration of gene expression by chromosome loss in the postnatal mouse  
1211 brain. *J. Neurosci.* 23, 5599-5606.
- 1212 Kempermann, G., Gage, F. H., Aigner, L., Song, H., Curtis, M. A., Thuret, S., et al.  
1213 (2018). Human adult neurogenesis: evidence and remaining questions. *Cell stem*  
1214 *cell* 23, 25-30
- 1215 Knoth, R., Singec, I., Ditter, M., Pantazis, G., Capetian, P., Meyer, R. P., et al. (2010).  
1216 Murine features of neurogenesis in the human hippocampus across the lifespan  
1217 from 0 to 100 years. *PloS one*, 5, e8809.
- 1218 Kohler, S. J., Williams, N. I., Stanton, G. B., Cameron, J. L., and Greenough, W. T.  
1219 (2011). Maturation time of new granule cells in the dentate gyrus of adult  
1220 macaque monkeys exceeds six months. *Proc. Natl. Acad. Sci, U. S. A.* 10326-31.
- 1221 Kornack, D. R. and Rakic, P. (1998). Changes in cell-cycle kinetics during the  
1222 development and evolution of primate neocortex. *Proc.Natl. Acad. Sci, USA* 95,  
1223 1242-1246.
- 1224 Lee, H., and Thuret, S. (2018). Adult Human Hippocampal Neurogenesis: Controversy  
1225 and Evidence. *Trends in Molecular Medicine.* 24, 521-522.
- 1226 Lumsden, A. and Krumlauf. R. (1996). Patterning the vertebrate neuraxis. *Science* 274, 1109-  
1227 1115.
- 1228 Merrill, D. A., Karim, R., Darraq, M., Chiba, A. A., and Tuszyński, M. H. (2003). Hippocampal  
1229 cell genesis does not correlate with spatial learning ability in aged rats. *J Comp. Neurol.*,  
1230 459, 201-207.
- 1231 Ming, G.-l. and Song, H. (2005). Adult neurogenesis in the mammalian central nervous system.  
1232 *Ann. Rev. Neurosci* 28, 223-250.  
1233 <https://doi.org/10.1146/annurev.neuro.28.051804.101459>
- 1234 Ngwenya, L. B., Peters, A., and Rosene, D. L. (2006). Maturation sequence of newly generated  
1235 neurons in the dentate gyrus of the young adult rhesus monkey *J Comp. Neurol* 498, 204-  
1236 216.
- 1237 Passingham, R. E. (1985). Rates of brain development in mammals including man. *Brain*  
1238 *Behav Evol* 26, 167-175.
- 1239 Passingham, R. E. and Smaers, J. B. (2014). Is the prefrontal cortex especially enlarged  
1240 in the human brain allometric relations and remapping factors. *Brain Behav. Evol.*  
1241 84, 156-166. <https://doi.org/10.1159/000365183>

## Comparing timetables of adult neurogenesis

- 1242 Piumatti, M., Palazzo, O., La Rosa, C., Crociara, P., Parolisi, R., Luzzati, F., et al.  
1243 (2018). Non-newly generated, “immature” neurons in the sheep brain are not  
1244 restricted to cerebral cortex. *J. Neurosci.* 38, 826-842.
- 1245 Puelles, L., Harrison, M., Paxinos, G., and Watson, C. (2013). A developmental  
1246 ontology for the mammalian brain based on the prosomeric model. *TINS* 36, 570-  
1247 578. [dx.doi.org/10.1016/j.tins.2013.06.004](https://doi.org/10.1016/j.tins.2013.06.004)
- 1248 Rao, M. S., Hattiangady, B., and Shetty, A. K. (2006). The window and mechanisms of  
1249 major age - related decline in the production of new neurons within the dentate  
1250 gyrus of the hippocampus. *Aging Cell* 5.6, 545-558.
- 1251 Reep, R., Darlington, R.B. and Finlay, B.L. (2007) The limbic system in mammalian  
1252 brain evolution. *Brain, Behav. Evol.* 70, 57-70
- 1253 Remtulla, S. and Hallet P. E. (1985). A schematic eye for the mouse and comparisons  
1254 with the rat. *Vis. Res.* 25, 21-31.
- 1255 Semendeferi, K., A. Lu, N. Schenker and H. Damasio (2002). Humans and great apes  
1256 share a large frontal cortex. *Nat. Neurosci.* 5, 272-276.
- 1257 Schoenemann, P. T. (2006). "Evolution of the size and functional areas of the human  
1258 brain." *Ann. Rev. Anthro.* 35, 379-406.
- 1259 Sherwood, C. C. and Smaers J. B. (2013). What's the fuss over human frontal lobe  
1260 evolution? *Trends Cogn. Sci.* 17, 432-433.
- 1261 Sorrells, S. F., Paredes, M. F., Cebrian-Silla, A., Sandoval, K., Qi, D., Kelley, K. W., et  
1262 al. (2018). Human hippocampal neurogenesis drops sharply in children to  
1263 undetectable levels in adults. *Nature* 555, 377-381.
- 1264 Smith CL, Blake JA, Kadin JA, Richardson JE, Bult CJ, and the Mouse Genome  
1265 Database Group. (2018). Mouse Genome Database (MGD)-2018: knowledgebase  
1266 for the laboratory mouse. *Nucleic Acids Res.* 46 (D1): D836–D842.
- 1267 Takahashi, T., R.S. Nowakowski and V. S. Caviness (1994). Mode of cell proliferation in the  
1268 developing mouse neocortex. *Proc. Natl. Acad. Sci. U.S.A.* 91, 375-379.
- 1269 Workman, A. D., Charvet, C. J., Clancy, B., Darlington, R. B., and Finlay, B. L. (2013).  
1270 Modeling transformations of neurodevelopmental sequences across mammalian  
1271 species. *J. Neurosci.* 33, 7368-7383. [https://doi.org/10.1523/JNEUROSCI.5746-](https://doi.org/10.1523/JNEUROSCI.5746-12.2013)  
1272 [12.2013](https://doi.org/10.1523/JNEUROSCI.5746-12.2013)
- 1273 Yopak, K., Lisney, T., Collin, S.E., Montgomery, J., Darlington, R.B. and Finlay, B.L.  
1274 (2010). Brain scaling from sharks to primates: A highly conserved vertebrate  
1275 pattern. *Proc. Natl. Acad. Sci. U.S.A.* 107, 12946-12951.
- 1276 Zhong, S., Zhang, S., Fan, X., Wu, Q., Yan, L., Dong, J., et al. (2018). A single-cell  
1277 RNA-seq survey of the developmental landscape of the human prefrontal cortex.  
1278 *Nature* 555, 524-528.
- 1279  
1280  
1281  
1282  
1283

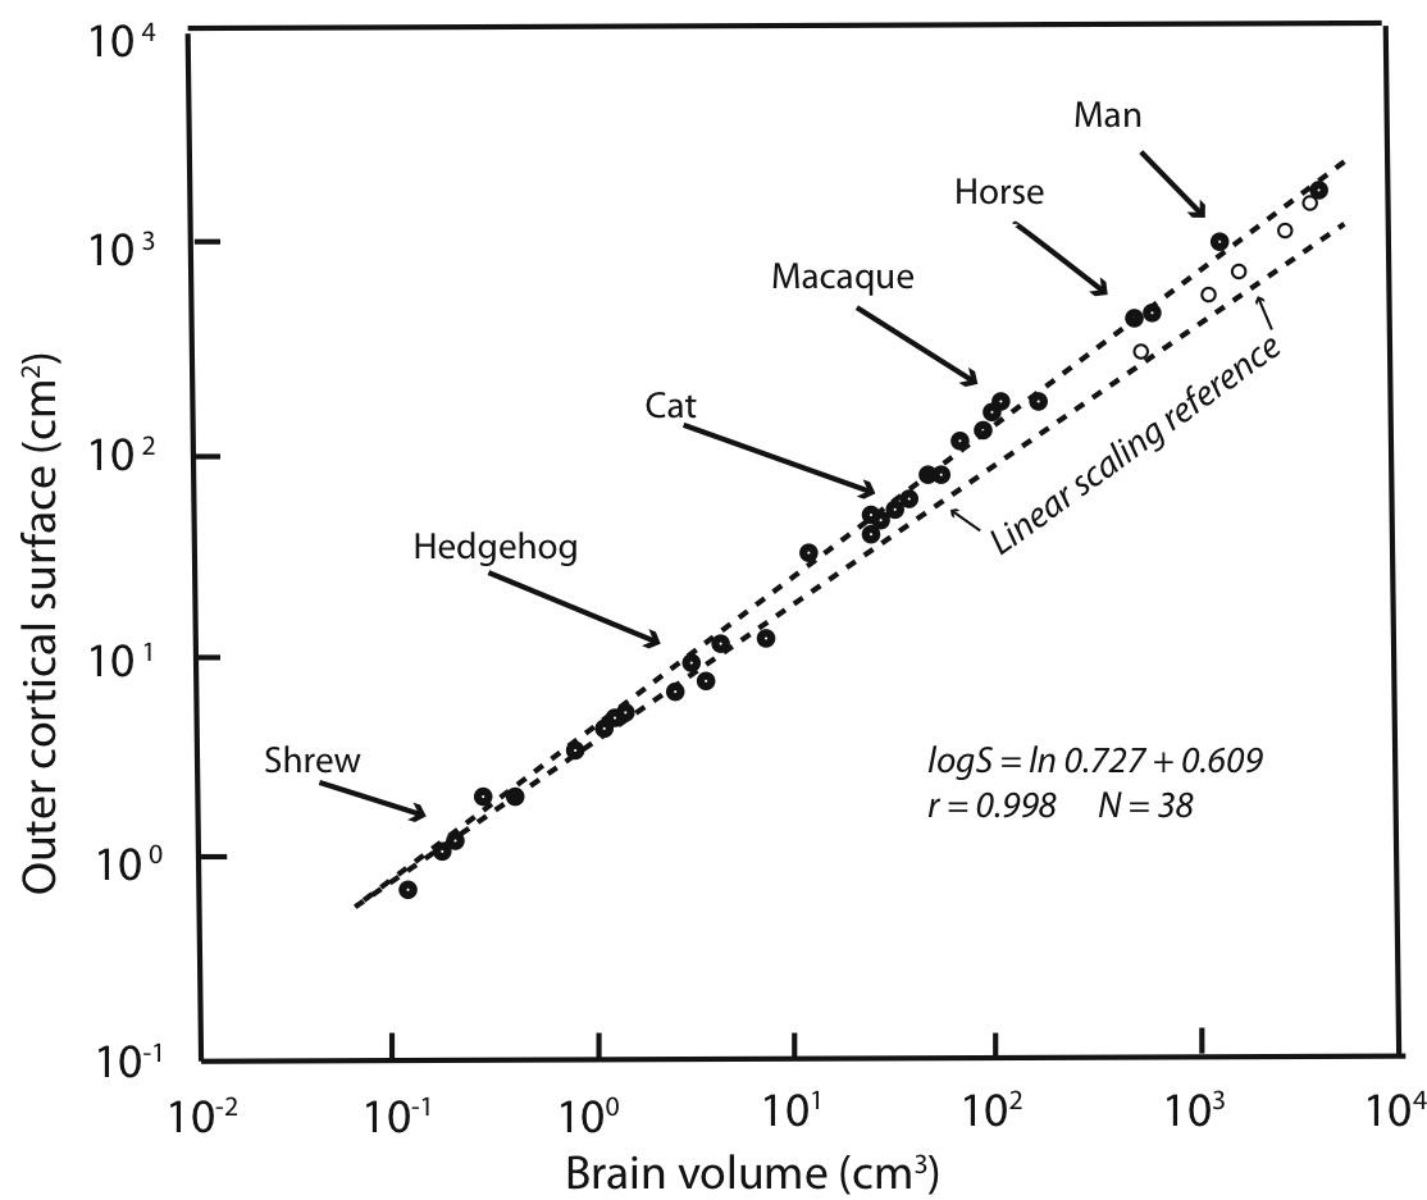

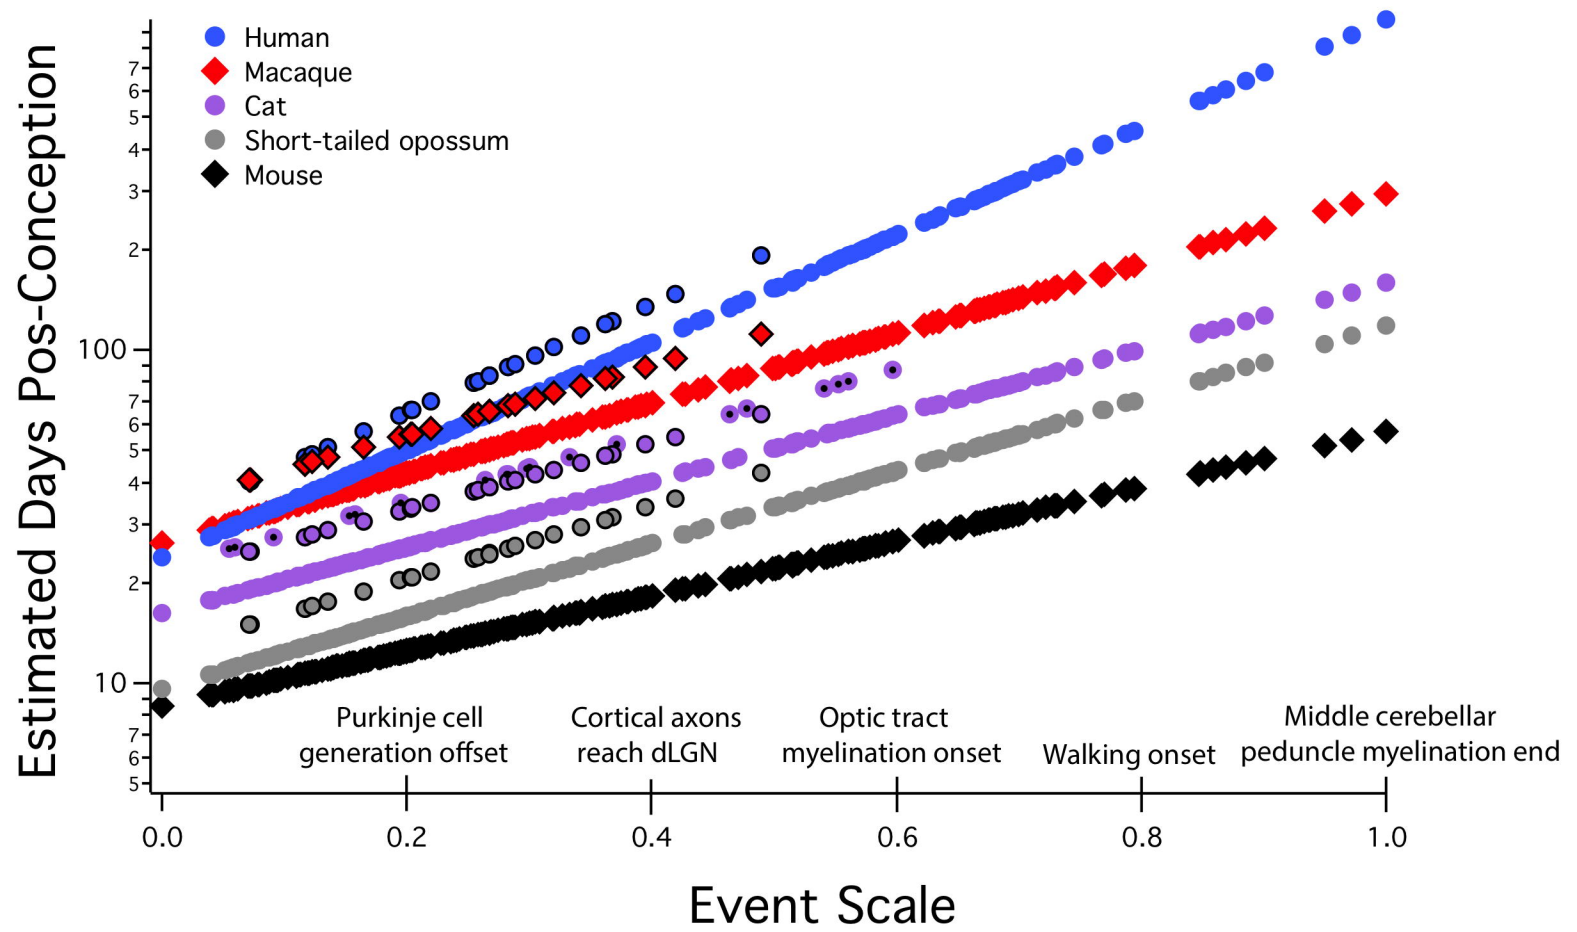

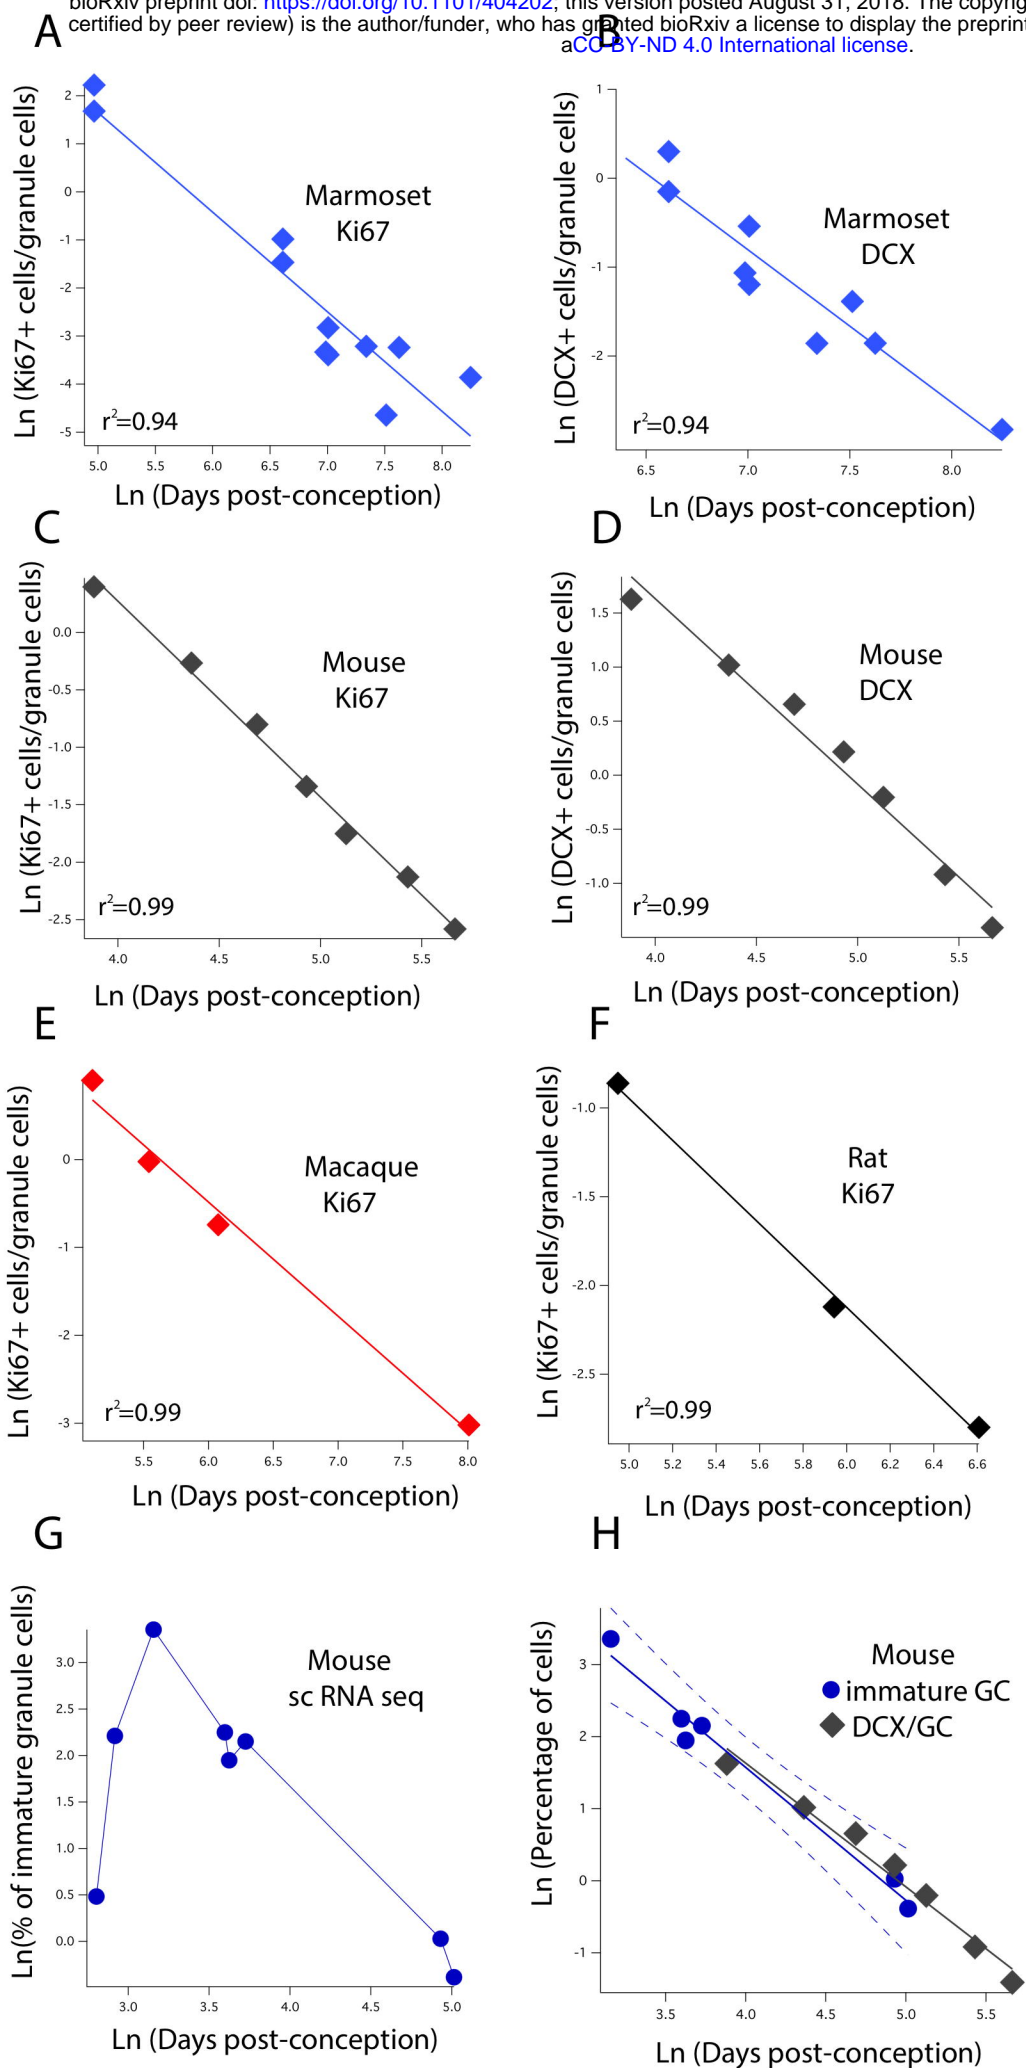



A

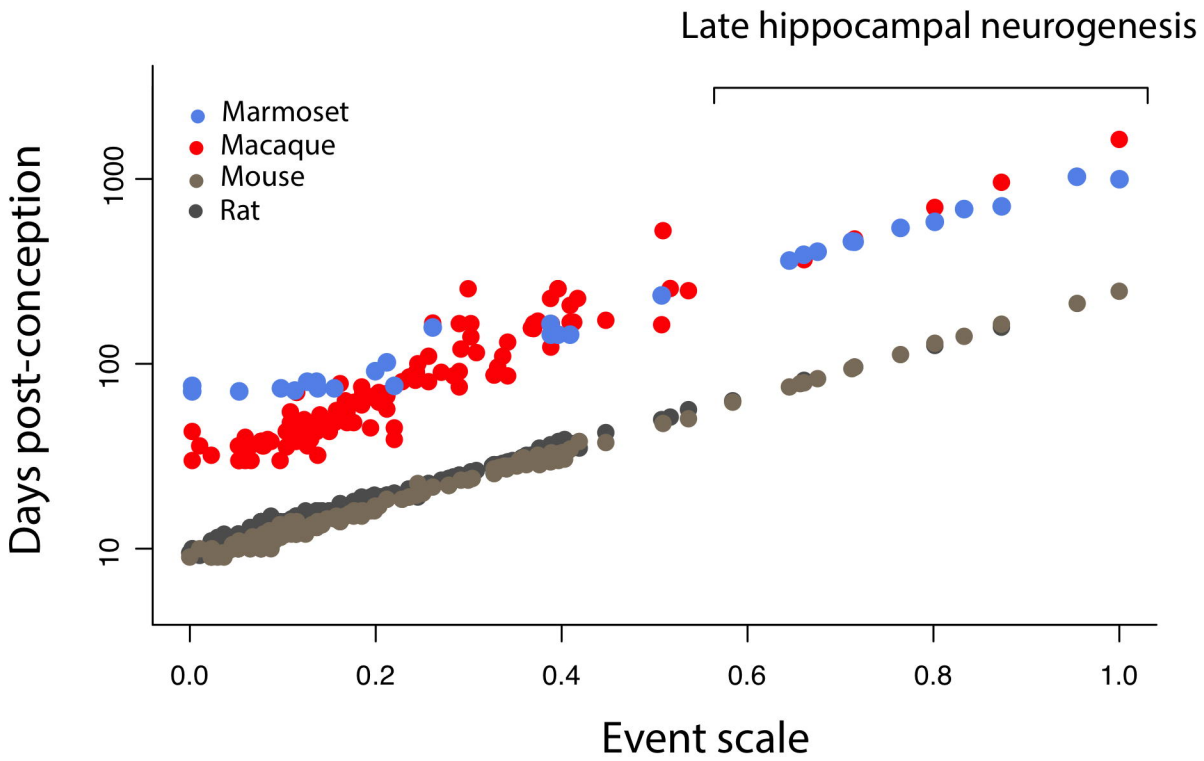

B

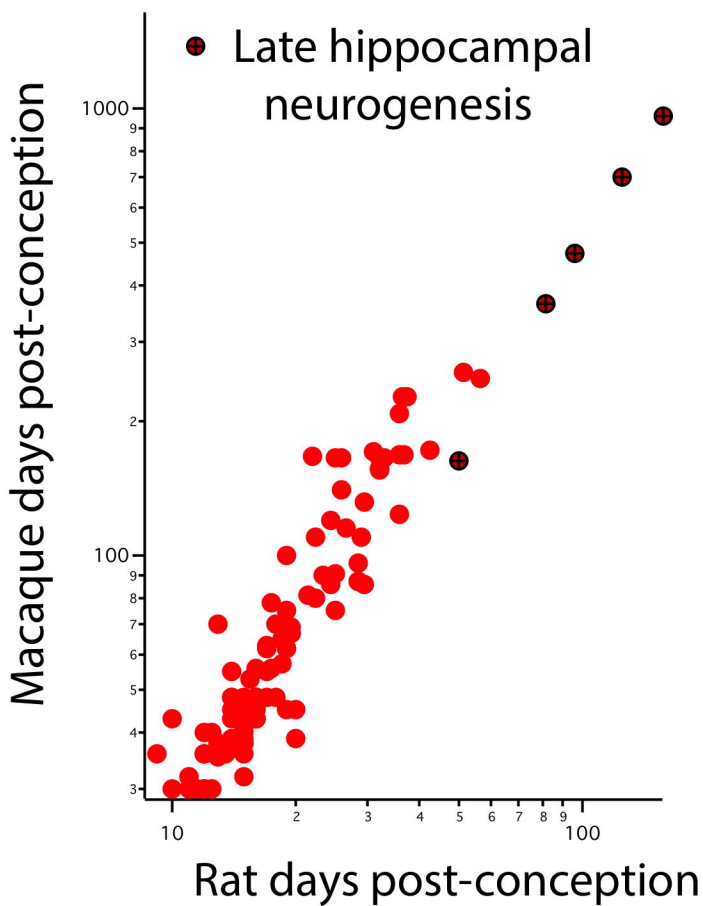

C

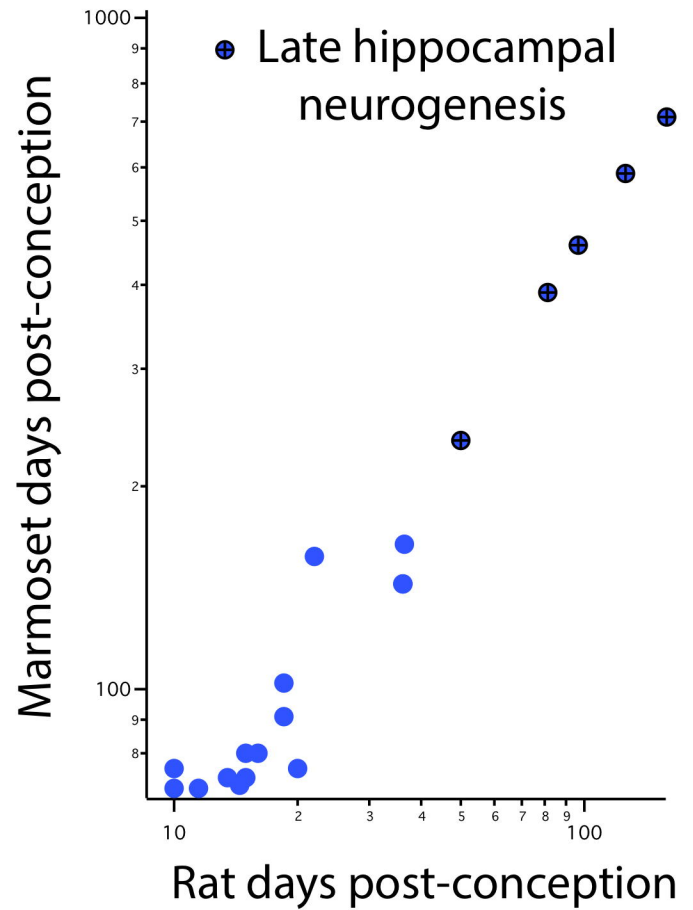

**A**

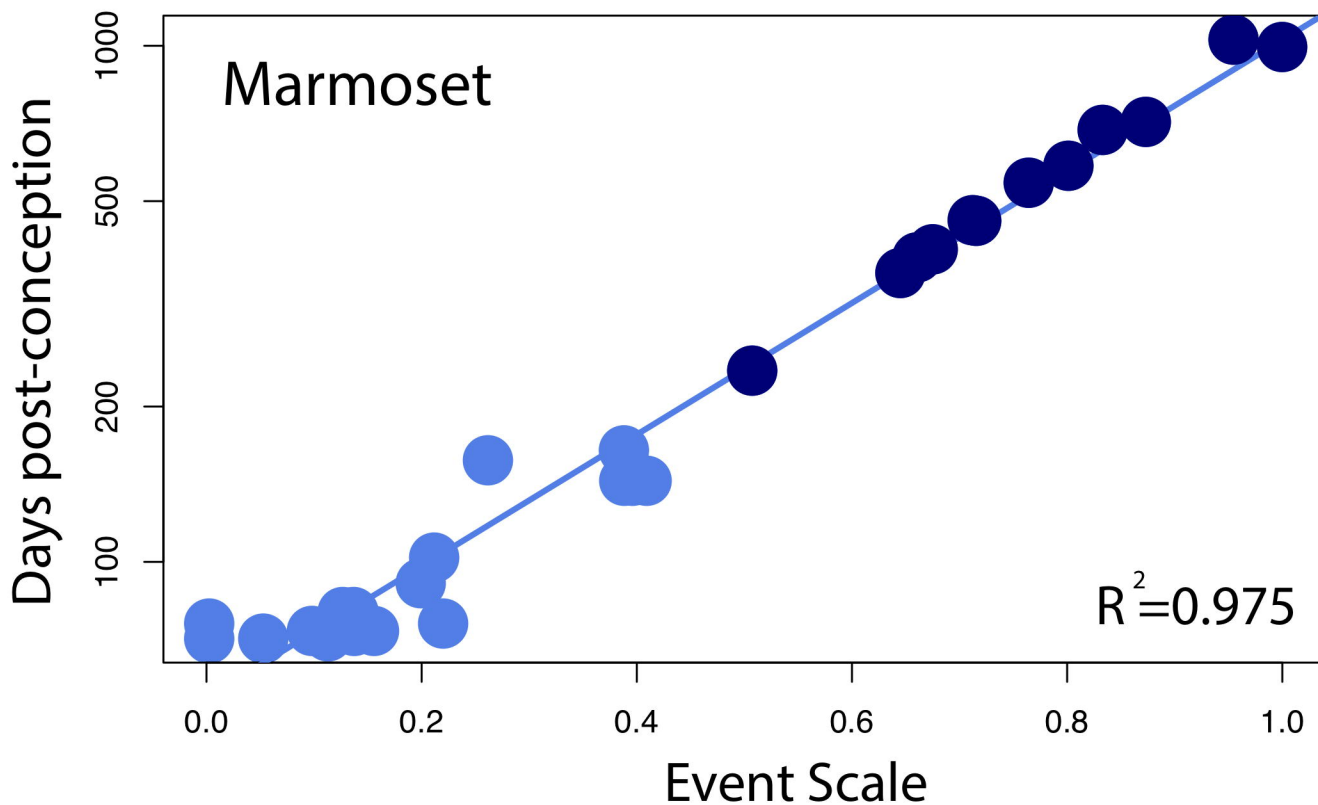

**B**

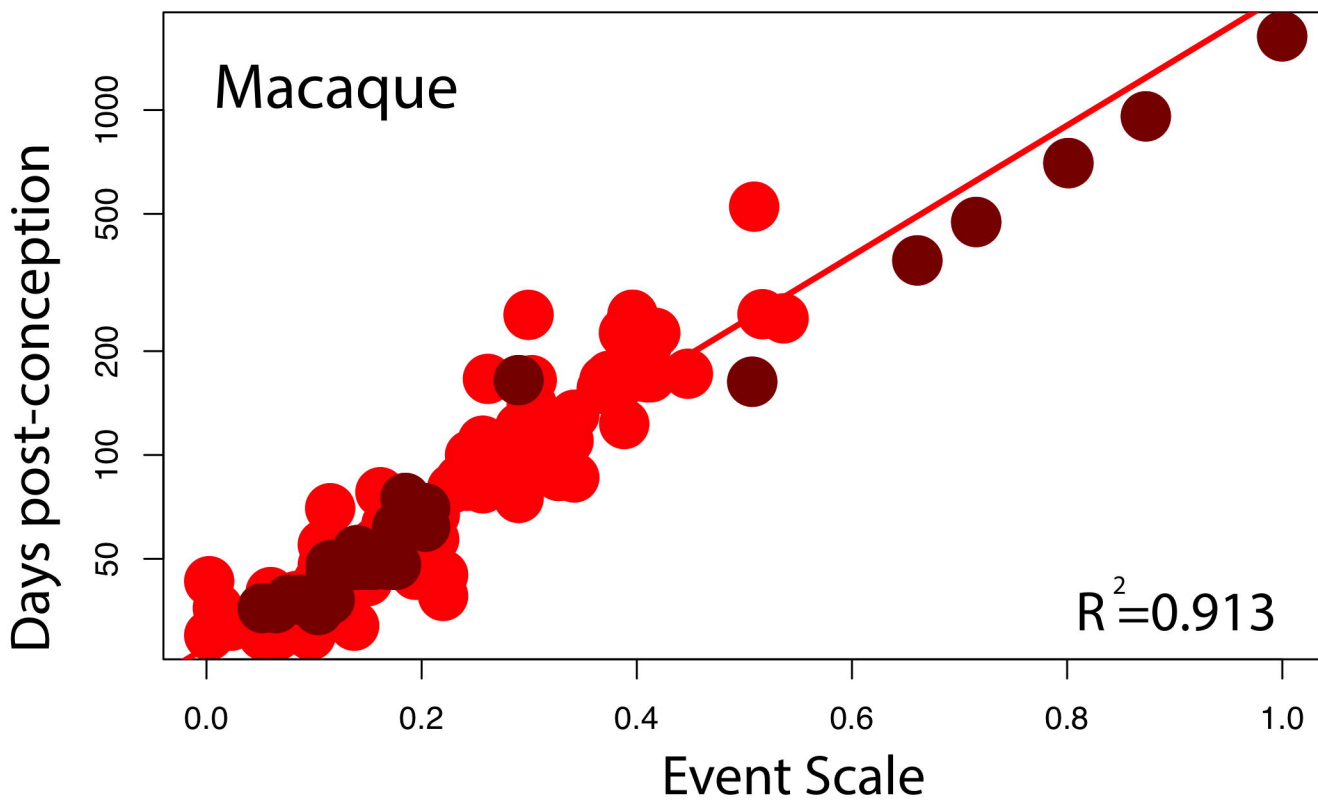

**A**

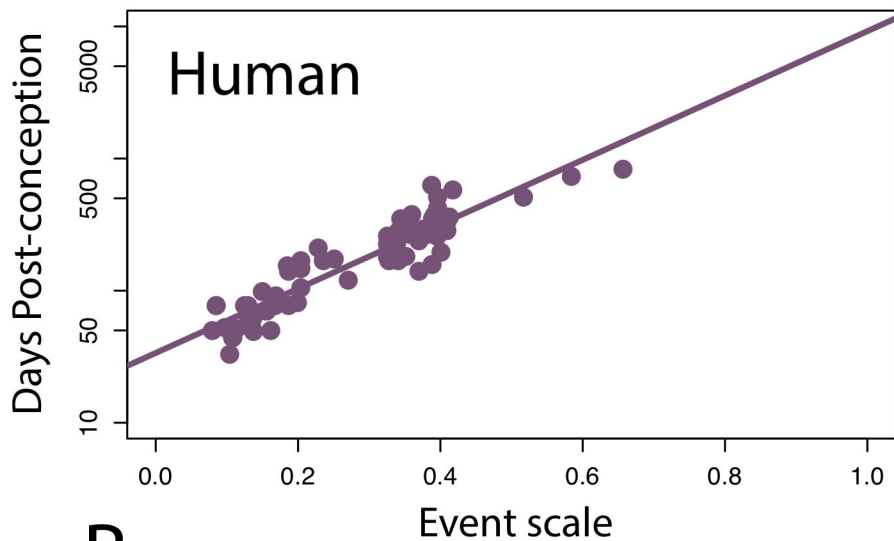

**B**

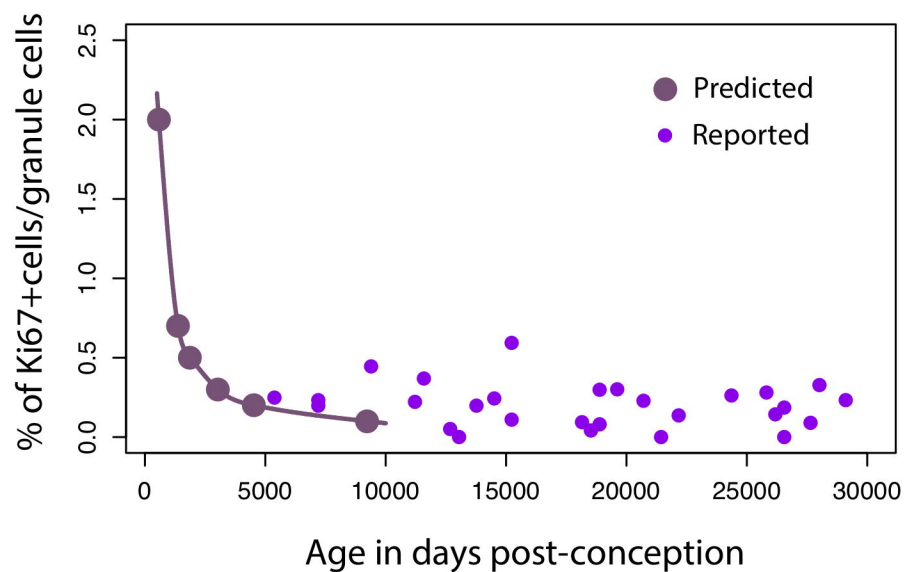

**C**

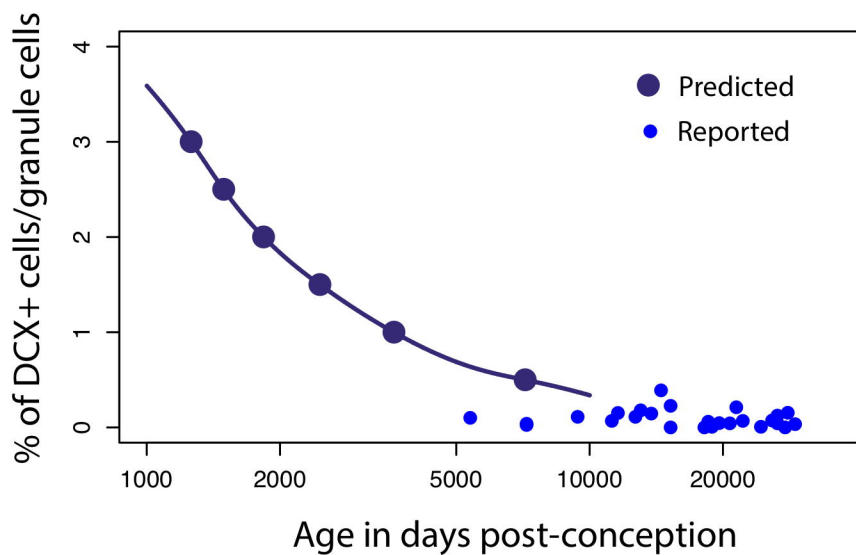

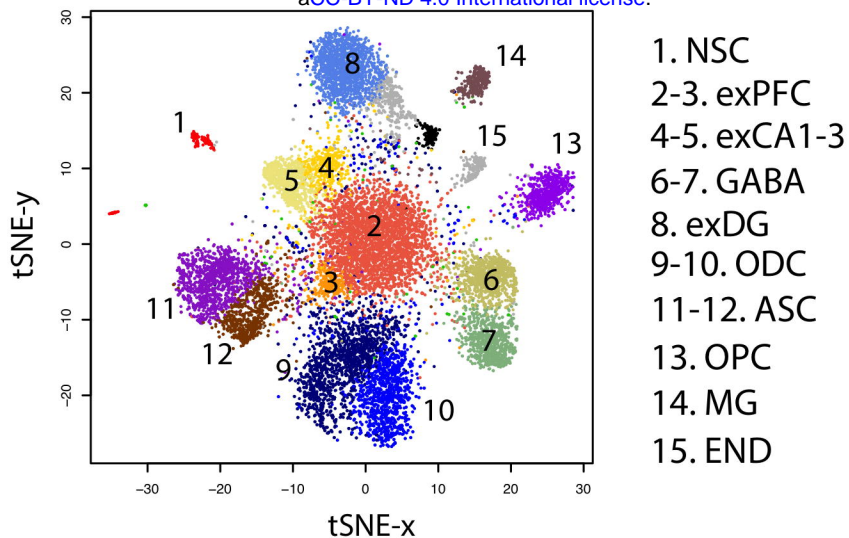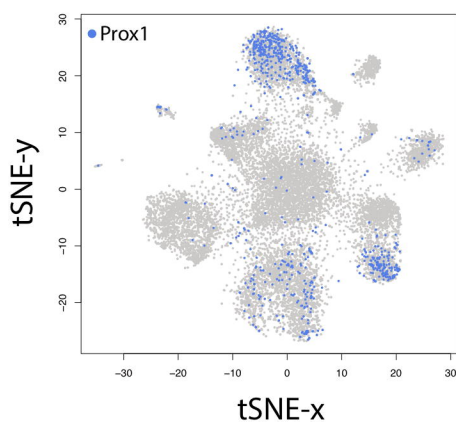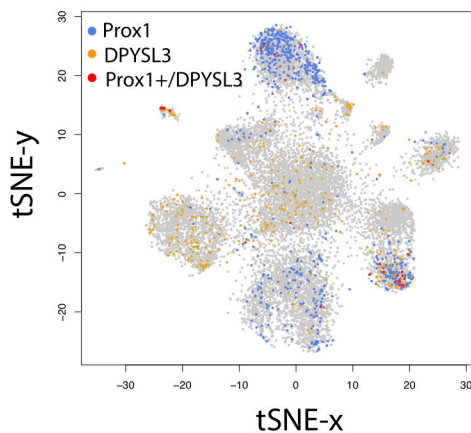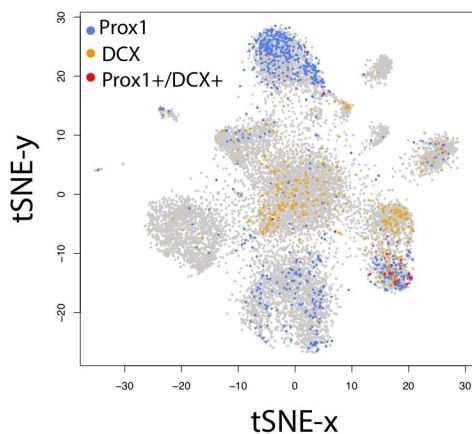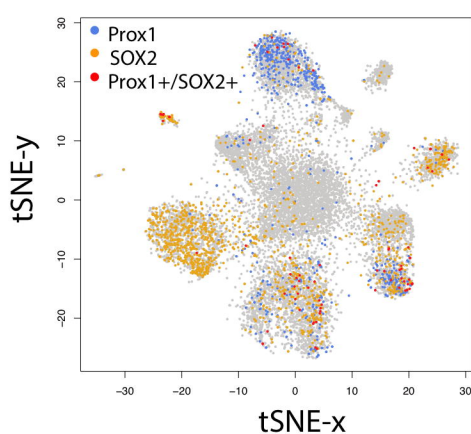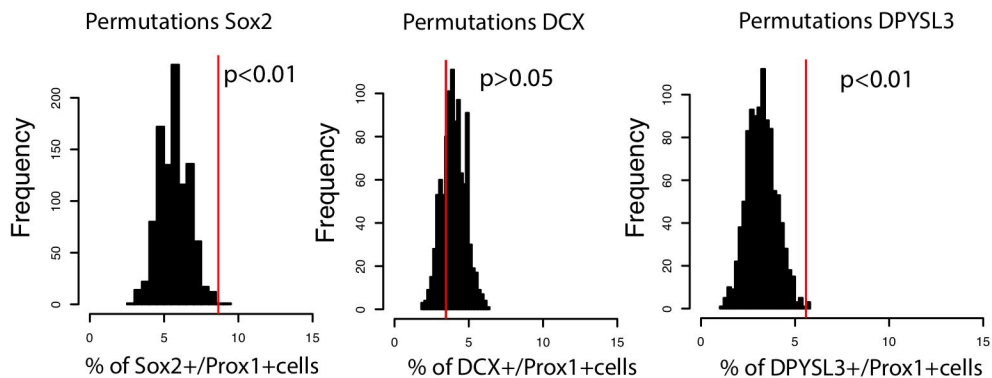

Source: http://biorxiv.org/content/10.1101/404202v1.full.pdf
